# Supplementary material for: Marine burial of terrestrial organic carbon modulates past warm climates
Source: Research Square preprint supplement (doi:10.21203/rs.3.rs-7272686/v1), 2025-09-03

**Supplementary Data:**

**Extended Data Fig. 1:** Fractional abundance of plant (orange), soil (red), and marine OC (blue) in the High Arctic during the Paleocene-Eocene. Error bars represent the 25% and 75% quantiles. Grey bar denotes the PETM onset, body and recovery interval.

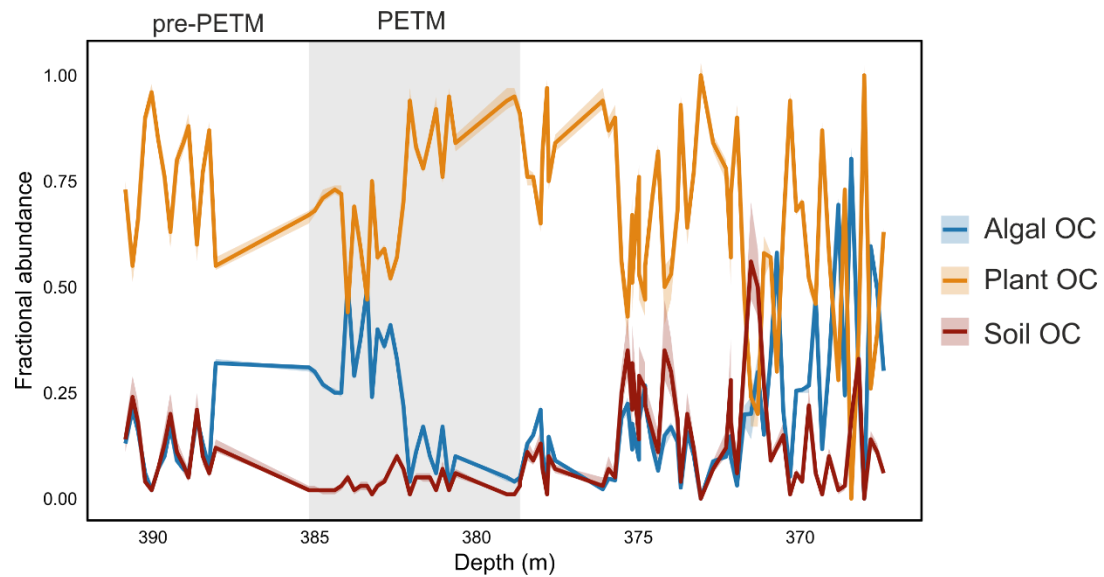

**Extended Data Fig. 2:** Fractional abundance of plant (orange), soil (red), and marine OC (blue) in the Tasman Sea during the Paleocene-Eocene. Error bars represent the 25% and 75% quantiles. Grey bar denotes the PETM onset, body and recovery interval/

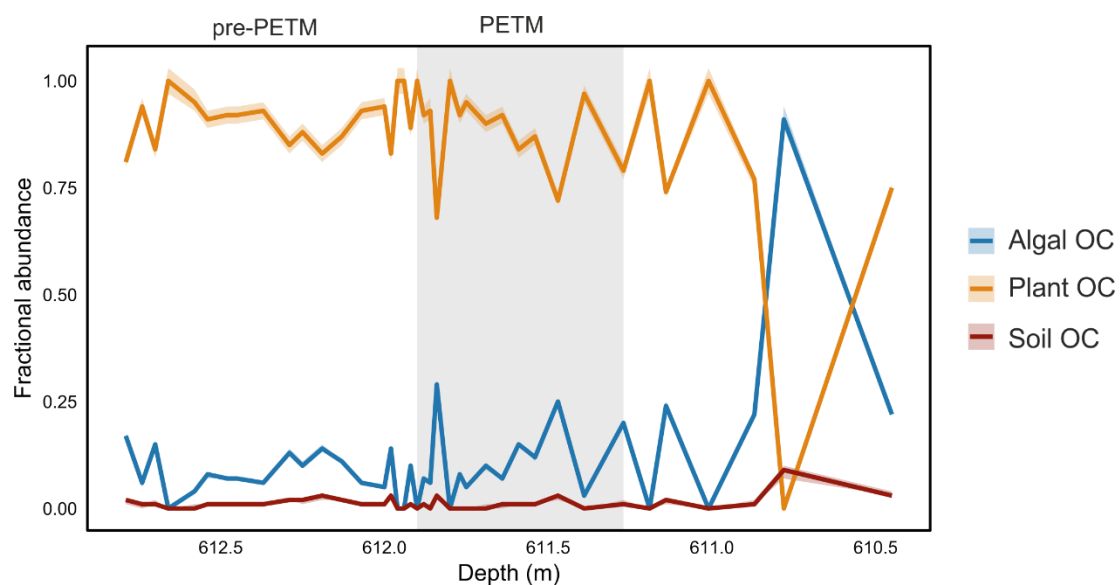

**Extended Data Fig. 3:** Fractional abundance of plant (orange), soil (red), and marine OC (blue) in the New Jersey Margin during the Paleocene-Eocene. Error bars represent the 25% and 75% quantiles. Grey bar denotes the PETM onset, body and recovery interval.

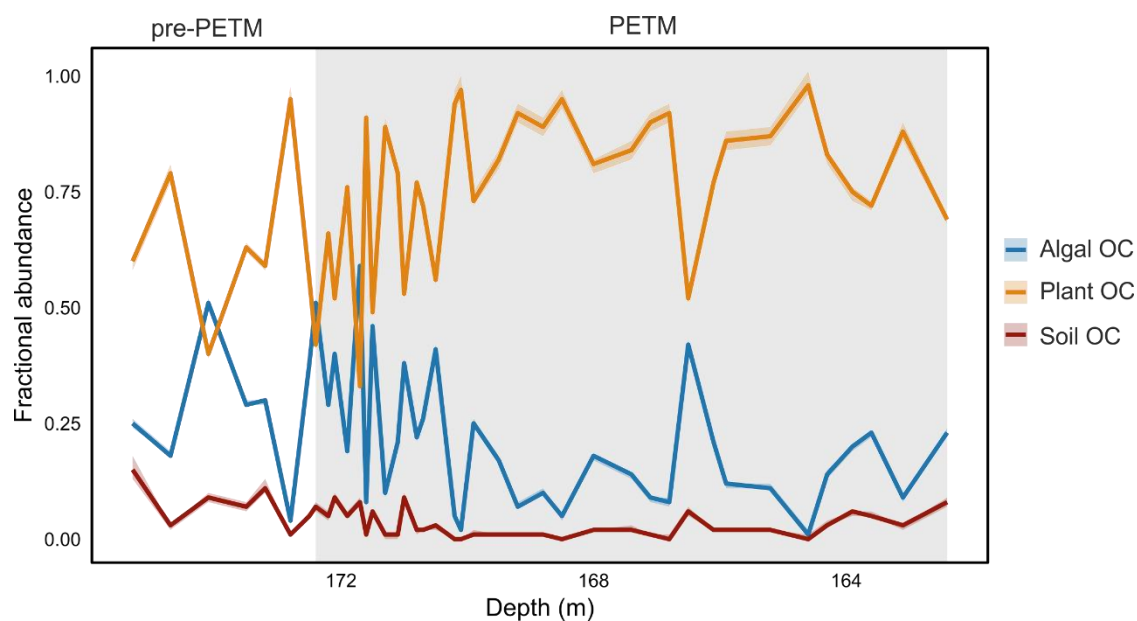

**Extended Data Fig. 4:** Fractional abundance of plant (orange), soil (red), and marine OC (blue) in Denmark during the Paleocene-Eocene. Error bars represent the 25% and 75% quantiles. Grey bar denotes the PETM onset, body and recovery interval.

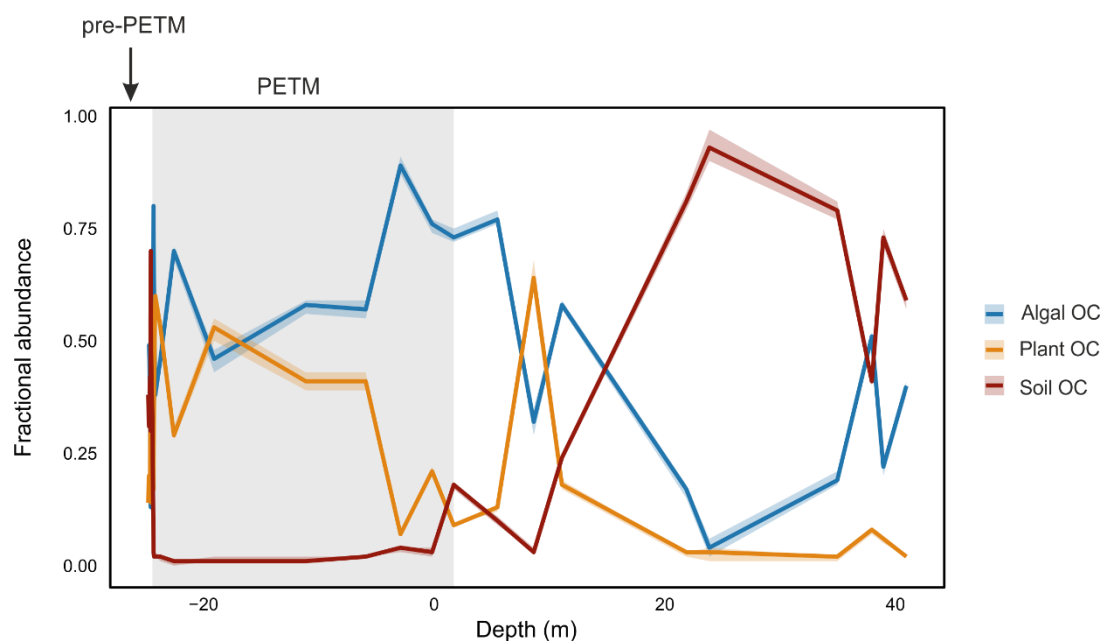

**Extended Data Fig. 5:** Fractional abundance of plant (orange), soil (red), and marine OC (blue) in Tanzania during the PETM and earliest Eocene. Error bars represent the 25% and 75% quantiles. Grey bar denotes the PETM onset, body and recovery interval.

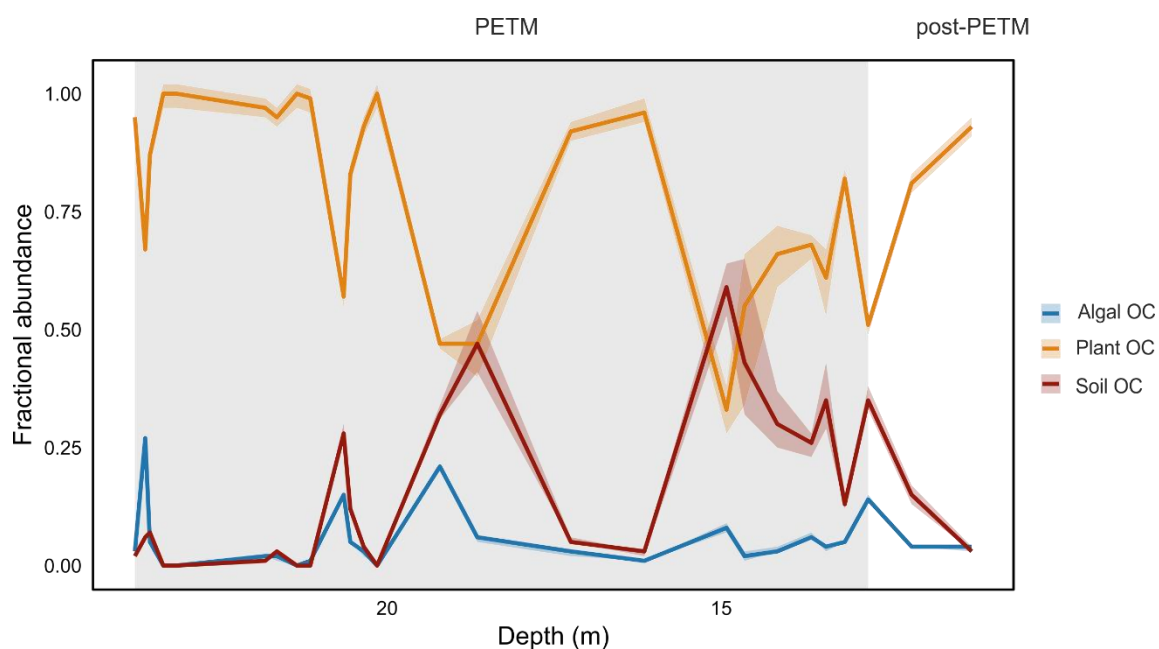

Supplement: Supplementary file 1 [file 615a772abfe52f29bb7cf9c1.pdf]
