# Supplementary material for: Marine burial of terrestrial organic carbon modulates past warm climates
Source: Research Square preprint supplement (doi:10.21203/rs.3.rs-7272686/v1), 2025-09-03
Supplement: Supplementary file 1 [file a8baa6602e9f470612b286b4.xlsx]

## Sheet: Sheet 1
Sheet 1	Lipid biomarker data and OC burial fluxes from Tasman Sea (Source data; Fig. 1)
site	depth	age	TAR	BIT	algal_median	algal_25pctile	algal_75pctile	algal_mean	algal_std	plant_median	plant_25pctile	plant_75pctile	plant_mean	plant_std	soil_median	soil_25pctile	soil_75pctile	soil_mean	soil_std	TOC (wt%)	LSR (cm/kyr-1)	DBD(g/cm-3)	TOC MAR (g/cm2/kyr-1)	MARalgal (g/cm2/kyr-1)	MARplant (g/cm2/kyr-1)	MARsoil (g/cm2/kyr-1)	LSRref	Notes
odp1172	610.45	post-PETM	0.771055	0.141134	0.220488	0.216571	0.224861	0.220742	0.00529812	0.745626	0.732663	0.760488	0.746301	0.0178627	0.0327192	0.0275748	0.0380273	0.0332495	0.0074116			2.65
odp1172	610.78	post-PETM	0	0.107542	0.913774	0.889113	0.93983	0.914342	0.0341454	1.69187e-17	0	1.23451e-16	7.71826e-17	1.13839e-16	0.0851664	0.0678195	0.103505	0.0869262	0.0237279	0.959267		2.65
odp1172	610.87	post-PETM	0.77866	0.086711	0.217495	0.213233	0.2217	0.217641	0.00520061	0.767706	0.753382	0.783295	0.768705	0.0183134	0.0135842	0.00935999	0.0182178	0.0139492	0.00554866	1.24799		2.65
odp1172	611.01	post-PETM	1	0.061061	0	0	0	0	0	1.00012	0.974545	1.02537	1.00033	0.0284622	8.09563e-07	2.2076e-07	1.82169e-06	1.08656e-06	9.70939e-07	1.1355		2.65
odp1172	611.14	post-PETM	0.750935	0.091182	0.244052	0.239437	0.248556	0.24419	0.00575523	0.738349	0.725027	0.752511	0.73885	0.0173757	0.0168644	0.0121298	0.022071	0.0172601	0.00631791	0.863679		2.65
odp1172	611.19	post-PETM	1	0.091728	0	0	0	0	0	1.00012	0.974545	1.02537	1.00033	0.0284622	8.73562e-07	2.4096e-07	1.98473e-06	1.1816e-06	1.05657e-06	0.81241		2.65
odp1172	611.27	PETM_recovery	0.799541	0.088156	0.197019	0.193186	0.201028	0.197203	0.00477068	0.789102	0.774048	0.805376	0.790027	0.0190388	0.0127436	0.00887121	0.0169266	0.0130613	0.00506192	0.734015		2.65
odp1172	611.39	PETM_recovery	0.970291	0.083726	0.0287903	0.0280961	0.0295344	0.0288131	0.000938115	0.97008	0.945617	0.99309	0.969785	0.0268215	0.00166499	0.00111781	0.00230646	0.00172442	0.000737219	0.768489		2.65
odp1172	611.47	PETM_recovery	0.742187	0.114112	0.250151	0.245688	0.254916	0.250415	0.00589899	0.722626	0.710186	0.736866	0.723363	0.0170062	0.0260199	0.0208815	0.0314734	0.0265231	0.00718056	0.55		2.65
odp1172	611.54	PETM_recovery	0.880712	0.106703	0.117155	0.114699	0.119692	0.117235	0.00302294	0.871174	0.853238	0.890345	0.871994	0.0222217	0.0108212	0.00843734	0.0134181	0.0110644	0.00328771	0.686589		2.65
odp1172	611.59	PETM_recovery	0.848647	0.095368	0.148858	0.145749	0.152027	0.148921	0.00373212	0.83887	0.8223	0.857156	0.8399	0.0208977	0.0112537	0.00827467	0.0144075	0.0114685	0.00395018	0.604232		2.65
odp1172	611.64	PETM_recovery	0.927774	0.105449	0.0708844	0.0693232	0.0725266	0.0709613	0.00194375	0.922235	0.90137	0.943493	0.922782	0.0244922	0.00640457	0.00496526	0.00796665	0.00656155	0.00198783	0.480379		2.65
odp1172	611.69	PETM_recovery	0.902649	0.072841	0.0960262	0.0940038	0.0982707	0.0961738	0.00254709	0.899162	0.879592	0.919533	0.899876	0.0234161	0.00410452	0.00226761	0.00618242	0.00424913	0.00236098	0.636564		2.65
odp1172	611.75	PETM_core	0.952526	0.057158	0.046546	0.0454615	0.0476798	0.0465946	0.00135996	0.952396	0.929175	0.974865	0.95258	0.0259245	0.000985031	0.000139887	0.00201022	0.00114085	0.000983422	0.645624	0.45	2.65	0.00769907	0.000358361	0.00733256	7.58382e-06	https://agupubs.onlinelibrary.wiley.com/doi/full/10.1029/2023PA004773	Use median sedimentation rate estimate
odp1172	611.77	PETM_core	0.922263	0.057814	0.0766947	0.0750277	0.0785015	0.0767971	0.00208942	0.92133	0.899932	0.942583	0.921575	0.0243976	0.00168089	0.000290853	0.00336423	0.00193298	0.00163832	0.5117	0.45	2.65	0.00610202	0.000467992	0.00562346	1.02568e-05	https://agupubs.onlinelibrary.wiley.com/doi/full/10.1029/2023PA004773	Use median sedimentation rate estimate
odp1172	611.8	PETM_core	1	0.090972	0	0	0	0	0	1.00012	0.974545	1.02537	1.00033	0.0284622	8.71957e-07	2.40413e-07	1.97965e-06	1.1791e-06	1.05431e-06	0.627178	0.45	2.65	0.0074791	0	0.00748159	6.52145e-09	https://agupubs.onlinelibrary.wiley.com/doi/full/10.1029/2023PA004773	Use median sedimentation rate estimate
odp1172	611.84	PETM_core	0.698596	0.104276	0.292588	0.287673	0.297906	0.292911	0.00680255	0.680151	0.668903	0.693034	0.680902	0.0157946	0.0259356	0.0200281	0.0322373	0.0265041	0.00797257	0.594433	0.45	2.65	0.00708861	0.00207404	0.00482665	0.000183847	https://agupubs.onlinelibrary.wiley.com/doi/full/10.1029/2023PA004773	Use median sedimentation rate estimate
odp1172	611.86	PETM_core	0.937209	0.097241	0.06159	0.060234	0.0630514	0.0616785	0.0017217	0.933376	0.911689	0.955052	0.933702	0.0250106	0.00484021	0.00359594	0.00615581	0.00492807	0.00166304	0.585371	0.45	2.65	0.00698054	0.000429931	0.00651775	3.37873e-05	https://agupubs.onlinelibrary.wiley.com/doi/full/10.1029/2023PA004773	Use median sedimentation rate estimate
odp1172	611.88	PETM_core	0.929779	0.113302	0.0688469	0.0673213	0.0704473	0.0689212	0.00189378	0.923619	0.902735	0.944976	0.924162	0.0245626	0.00705354	0.00562351	0.00863803	0.00722168	0.00201179	0.576308	0.45	2.65	0.00687248	0.000473148	0.00635128	4.84753e-05	https://agupubs.onlinelibrary.wiley.com/doi/full/10.1029/2023PA004773	Use median sedimentation rate estimate
odp1172	611.9	PETM_core	1	0.102333	0	0	0	0	0	1.00012	0.974545	1.02537	1.00033	0.0284622	8.96547e-07	2.48556e-07	2.04607e-06	1.21745e-06	1.08898e-06	0.567246	0.45	2.65	0.00676441	0	0.00676667	6.06461e-09	https://agupubs.onlinelibrary.wiley.com/doi/full/10.1029/2023PA004773	Use median sedimentation rate estimate
odp1172	611.92	pre-PETM	0.902901	0.116613	0.0952196	0.0932032	0.0973977	0.0953215	0.00251727	0.893711	0.874486	0.913747	0.894487	0.0232071	0.0102729	0.00824864	0.0124438	0.0104888	0.00282345	0.558184	0.57	2.65	0.00843136	0.000802831	0.00754174	8.66147e-05	https://agupubs.onlinelibrary.wiley.com/doi/full/10.1029/2023PA004773
odp1172	611.94	pre-PETM	1	0.137161	0	0	0	0	0	1.00012	0.974545	1.02537	1.00033	0.0284622	9.89578e-07	2.76411e-07	2.25286e-06	1.34772e-06	1.20736e-06	0.549121	0.57	2.65	0.00829448	0	0.00829725	8.20803e-09	https://agupubs.onlinelibrary.wiley.com/doi/full/10.1029/2023PA004773
odp1172	611.96	pre-PETM	1	0.155635	0	0	0	0	0	1.00012	0.974545	1.02537	1.00033	0.0284622	1.04632e-06	2.92748e-07	2.38416e-06	1.42572e-06	1.2787e-06	0.542209	0.57	2.65	0.00819006	0	0.0081928	8.56947e-09	https://agupubs.onlinelibrary.wiley.com/doi/full/10.1029/2023PA004773
odp1172	611.98	pre-PETM	0.853877	0.167584	0.141246	0.138382	0.144191	0.141339	0.00356768	0.829479	0.813689	0.847473	0.830933	0.0208135	0.0274071	0.0236762	0.0316254	0.0280143	0.00573248	0.537446	0.57	2.65	0.00811812	0.00114665	0.00674561	0.000222494	https://agupubs.onlinelibrary.wiley.com/doi/full/10.1029/2023PA004773
odp1172	612	pre-PETM	0.94621	0.160524	0.0523941	0.0511936	0.0536533	0.0524575	0.0014931	0.937905	0.915955	0.959703	0.938133	0.0252675	0.00949256	0.0081637	0.0110177	0.00971917	0.00206803	0.440145	0.57	2.65	0.00664839	0.000348336	0.00623707	6.31102e-05	https://agupubs.onlinelibrary.wiley.com/doi/full/10.1029/2023PA004773
odp1172	612.07	pre-PETM	0.940319	0.16557	0.0581254	0.0568337	0.0595206	0.0582035	0.00163088	0.930487	0.909106	0.951959	0.930778	0.0249249	0.0110826	0.00955832	0.0128147	0.0113255	0.00237337	0.548371	0.57	2.65	0.00828314	0.000481461	0.00770976	9.17984e-05	https://agupubs.onlinelibrary.wiley.com/doi/full/10.1029/2023PA004773
odp1172	612.13	pre-PETM	0.88636	0.155038	0.110626	0.108289	0.113079	0.110702	0.00286807	0.868982	0.851243	0.888581	0.87019	0.0222555	0.0189516	0.0162747	0.0220107	0.0193989	0.00415069	0.584323	0.57	2.65	0.0088262	0.000976409	0.00768048	0.000167271	https://agupubs.onlinelibrary.wiley.com/doi/full/10.1029/2023PA004773
odp1172	612.19	pre-PETM	0.852321	0.159645	0.143011	0.140125	0.14599	0.14311	0.00360365	0.829599	0.813764	0.847372	0.83091	0.0207658	0.0256389	0.0221215	0.0297497	0.0262657	0.00549733	0.554027	0.57	2.65	0.00836858	0.0011968	0.00695354	0.000214561	https://agupubs.onlinelibrary.wiley.com/doi/full/10.1029/2023PA004773
odp1172	612.25	pre-PETM	0.892452	0.145391	0.104949	0.102733	0.107261	0.105019	0.00273771	0.877889	0.859457	0.897312	0.878666	0.0225772	0.0162893	0.01383	0.0189539	0.0166083	0.00369815	0.517038	0.57	2.65	0.00780987	0.000819634	0.00686226	0.000127217	https://agupubs.onlinelibrary.wiley.com/doi/full/10.1029/2023PA004773
odp1172	612.29	pre-PETM	0.864404	0.134746	0.132295	0.129568	0.135085	0.132377	0.00335912	0.848624	0.831409	0.866875	0.849402	0.0213598	0.0180822	0.0152102	0.0213159	0.0185101	0.00433671	0.491487	0.57	2.65	0.00742392	0.000982145	0.00630589	0.000134241	https://agupubs.onlinelibrary.wiley.com/doi/full/10.1029/2023PA004773
odp1172	612.37	pre-PETM	0.936353	0.150498	0.0620945	0.0607489	0.0635863	0.0621875	0.00172793	0.927492	0.906207	0.948599	0.927721	0.0247637	0.0101627	0.00867507	0.0118466	0.010397	0.00228421	0.568327	0.57	2.65	0.00858457	0.000533055	0.00796409	8.72424e-05	https://agupubs.onlinelibrary.wiley.com/doi/full/10.1029/2023PA004773
odp1172	612.45	pre-PETM	0.925239	0.139671	0.0730973	0.0714812	0.0748001	0.0731654	0.00199176	0.915793	0.895308	0.936498	0.916288	0.0242198	0.0106326	0.00896408	0.0124433	0.010849	0.00249734	0.583725	0.57	2.65	0.00881716	0.000644511	0.00807906	9.37496e-05	https://agupubs.onlinelibrary.wiley.com/doi/full/10.1029/2023PA004773
odp1172	612.48	pre-PETM	0.926506	0.14247	0.0718233	0.0702422	0.0735143	0.0718991	0.00196125	0.916891	0.89636	0.937668	0.917395	0.0242742	0.0107767	0.00909926	0.0126092	0.0110082	0.0024995	0.593929	0.57	2.65	0.0089713	0.000644348	0.00823023	9.66811e-05	https://agupubs.onlinelibrary.wiley.com/doi/full/10.1029/2023PA004773
odp1172	612.54	pre-PETM	0.921874	0.132561	0.076456	0.0747722	0.0782532	0.0765306	0.00207272	0.912803	0.892479	0.933545	0.913347	0.0240762	0.0101546	0.00850778	0.0120431	0.010424	0.00249617	0.614976	0.57	2.65	0.00928922	0.000710216	0.00848428	9.43283e-05	https://agupubs.onlinelibrary.wiley.com/doi/full/10.1029/2023PA004773
odp1172	612.58	pre-PETM	0.95823	0.119661	0.0406779	0.0397358	0.0416912	0.0407464	0.00121533	0.954656	0.931455	0.977329	0.954884	0.0260657	0.0045803	0.00372612	0.00553445	0.00468531	0.00123772		0.57	2.65
odp1172	612.66	pre-PETM	1	0.108798	0	0	0	0	0	1.00012	0.974545	1.02537	1.00033	0.0284622	9.11007e-07	2.53072e-07	2.07785e-06	1.24012e-06	1.10953e-06		0.57	2.65
odp1172	612.7	pre-PETM	0.851446	0.107193	0.145765	0.142711	0.148812	0.145796	0.00366013	0.839739	0.822849	0.857826	0.840625	0.0209459	0.0135442	0.0105927	0.0167723	0.013868	0.00408589		0.57	2.65
odp1172	612.74	pre-PETM	0.943471	0.110075	0.0553259	0.0540922	0.0566444	0.0554068	0.00156885	0.939206	0.91681	0.96099	0.939379	0.0252925	0.00538185	0.00425307	0.00663614	0.00552398	0.00159253		0.57	2.65
odp1172	612.79	pre-PETM	0.82563	0.114479	0.170473	0.166984	0.173884	0.170536	0.00419691	0.810619	0.795	0.82751	0.811579	0.0198673	0.0178166	0.0142377	0.0216245	0.0181734	0.00494668		0.57	2.65

## Sheet: Sheet 2
Sheet 2	Lipid biomarker data and OC burial fluxes from New Jersey Margin (source data: Fig.1)
site	depth	age	TAR	BIT	algal_median	algal_25pctile	algal_75pctile	algal_mean	algal_std	plant_median	plant_25pctile	plant_75pctile	plant_mean	plant_std	soil_median	soil_25pctile	soil_75pctile	soil_mean	soil_std	DBD(g/cm-3)	LSR (cm/kyr-1)	TOC (wt%)	TOC MAR (g/cm2/kyr-1)	MARalgal (g/cm2/kyr-1)	MARplant (g/cm2/kyr-1)	MARsoil (g/cm2/kyr-1)	LSRref
ancora	162.443	PETM recovery	0.737618	0.222877	0.232186	0.226664	0.23783	0.2323	0.00790753	0.690645	0.676694	0.704819	0.690819	0.01938	0.0756747	0.0664494	0.0879231	0.0776823	0.0135571	2.65	8.4	0.56	0.124656	0.0289434	0.086093	0.00943331	https://agupubs.onlinelibrary.wiley.com/doi/full/10.1029/2022PA004475
ancora	163.053	PETM recovery	0.895778	0.211165	0.0888323	0.0825605	0.0949041	0.0887775	0.00748107	0.884221	0.864721	0.904677	0.884862	0.0254401	0.0266329	0.0231708	0.0310854	0.0273835	0.00543848	2.65	8.4	0.49	0.109074	0.0096893	0.0964456	0.00290496	https://agupubs.onlinelibrary.wiley.com/doi/full/10.1029/2022PA004476
ancora	163.632	PETM recovery	0.749515	0.17524	0.226993	0.22153	0.232551	0.227093	0.00776763	0.72045	0.706607	0.734769	0.720785	0.0188753	0.051737	0.0455477	0.0595367	0.0529539	0.00919969	2.65	8.4	0.54	0.120204	0.0272855	0.086601	0.006219	https://agupubs.onlinelibrary.wiley.com/doi/full/10.1029/2022PA004477
ancora	163.906	PETM recovery	0.780068	0.203479	0.196754	0.191264	0.20218	0.1968	0.00753195	0.74634	0.731517	0.761744	0.746725	0.0202737	0.0558623	0.0490877	0.0648023	0.0573299	0.0101069	2.65	8.4	0.51	0.113526	0.0223367	0.084729	0.00634182	https://agupubs.onlinelibrary.wiley.com/doi/full/10.1029/2022PA004478
ancora	164.272	PETM recovery	0.842958	0.179238	0.140058	0.13425	0.145674	0.140022	0.00744054	0.826622	0.809376	0.844456	0.827146	0.0226486	0.0329114	0.0288931	0.0381071	0.0337791	0.00615889	2.65	8.4	0.53	0.117978	0.0165237	0.0975232	0.00388283	https://agupubs.onlinelibrary.wiley.com/doi/full/10.1029/2022PA004479
ancora	164.577	PETM recovery	0.971454	0.207731	0.0143806	0.00735005	0.0214292	0.0143556	0.00816653	0.98162	0.957724	1.00655	0.982494	0.0303355	0.00420193	0.00216389	0.00624959	0.00432368	0.00262031	2.65	8.4	0.54	0.120204	0.0017286	0.117995	0.000505089	https://agupubs.onlinelibrary.wiley.com/doi/full/10.1029/2022PA004480
ancora	165.247	PETM recovery	0.872904	0.154845	0.112004	0.105901	0.117959	0.112015	0.00755391	0.866473	0.847735	0.88601	0.867186	0.0241115	0.0212997	0.0185761	0.0245822	0.021798	0.00413572	2.65	8.4	0.5	0.1113	0.0124661	0.0964385	0.00237066	https://agupubs.onlinelibrary.wiley.com/doi/full/10.1029/2022PA004481
ancora	165.91	petm onset/body	0.867556	0.138122	0.117628	0.111503	0.123546	0.117622	0.00759201	0.863355	0.844683	0.8827	0.864013	0.0238416	0.0189646	0.0164572	0.0218362	0.0193601	0.00371915	2.65	4.3	0.47	0.0535565	0.00629975	0.0462383	0.00101568	https://agupubs.onlinelibrary.wiley.com/doi/full/10.1029/2022PA004482
ancora	166.131	petm onset/body	0.773799	0.0916339	0.211169	0.20536	0.216764	0.211114	0.00791373	0.770469	0.755526	0.786152	0.771048	0.0196339	0.0183545	0.0154833	0.0215095	0.0187259	0.00419826	2.65	4.3	0.48	0.054696	0.0115501	0.0421416	0.00100392	https://agupubs.onlinelibrary.wiley.com/doi/full/10.1029/2022PA004483
ancora	166.467	petm onset/body	0.547131	0.126144	0.41834	0.411228	0.425501	0.418458	0.0102035	0.522039	0.512955	0.531198	0.52208	0.0127588	0.0591042	0.0518597	0.0673605	0.0601808	0.0107434	2.65	4.3	0.43	0.0489985	0.0204981	0.0255791	0.00289602	https://agupubs.onlinelibrary.wiley.com/doi/full/10.1029/2022PA004484
ancora	166.802	petm onset/body	0.906722	0.0660201	0.0798805	0.0732315	0.0863759	0.079851	0.0078484	0.916494	0.895449	0.938064	0.917139	0.0260581	0.00397576	0.00297705	0.00501601	0.00407959	0.00136779	2.65	4.3	0.43	0.0489985	0.00391402	0.0449068	0.000194806	https://agupubs.onlinelibrary.wiley.com/doi/full/10.1029/2022PA004485
ancora	167.076	petm onset/body	0.899489	0.108243	0.0866859	0.0801857	0.0930577	0.08665	0.00774412	0.90373	0.883314	0.924768	0.904465	0.0255972	0.00972321	0.00827629	0.0113136	0.00993634	0.00218002	2.65	4.3	0.4	0.04558	0.00395114	0.041192	0.000443184	https://agupubs.onlinelibrary.wiley.com/doi/full/10.1029/2022PA004486
ancora	167.35	petm onset/body	0.846843	0.136301	0.137921	0.13192	0.143589	0.13784	0.00758101	0.840228	0.822534	0.858543	0.840878	0.0228003	0.0218116	0.0189677	0.0250585	0.0222478	0.00420486	2.65	11.2	0.48	0.142464	0.0196488	0.119702	0.00310736	https://agupubs.onlinelibrary.wiley.com/doi/full/10.1029/2022PA004487
ancora	167.952	petm onset/body	0.808952	0.101865	0.176223	0.170336	0.181811	0.176148	0.00774941	0.805795	0.78952	0.822785	0.806365	0.0211007	0.0180476	0.0154405	0.0209555	0.0184124	0.00386408	2.65	11.2	0.46	0.136528	0.0240594	0.110014	0.002464	https://agupubs.onlinelibrary.wiley.com/doi/full/10.1029/2022PA004488
ancora	168.539	petm onset/body	0.940695	0.0815525	0.0455284	0.0387187	0.0523576	0.0455215	0.00798139	0.951406	0.92907	0.974916	0.95225	0.0279706	0.00322441	0.00257941	0.00398273	0.00335086	0.00102907	2.65	11.2	0.42	0.124656	0.00567539	0.118599	0.000401942	https://agupubs.onlinelibrary.wiley.com/doi/full/10.1029/2022PA004489
ancora	168.844	petm onset/body	0.881944	0.10222	0.104183	0.0978984	0.11037	0.104183	0.00771267	0.885215	0.865599	0.90542	0.88589	0.0246567	0.0107151	0.00911099	0.0125121	0.0109516	0.00240408	2.65	11.2	0.42	0.124656	0.0129871	0.110347	0.0013357	https://agupubs.onlinelibrary.wiley.com/doi/full/10.1029/2022PA004490
ancora	169.239	petm onset/body	0.914216	0.098039	0.0721027	0.065443	0.0785993	0.0720493	0.00781949	0.921226	0.900042	0.943157	0.921923	0.0264346	0.00694226	0.00581776	0.00818623	0.00710432	0.00170313	2.65	11.2	0.42	0.124656	0.00898803	0.114836	0.000865394	https://agupubs.onlinelibrary.wiley.com/doi/full/10.1029/2022PA004491
ancora	169.522	petm onset/body	0.815738	0.0727385	0.170839	0.164903	0.176545	0.170776	0.00783831	0.819181	0.80229	0.836558	0.819803	0.0215199	0.0101576	0.00799113	0.0124238	0.0103637	0.00294325	2.65	11.2	0.44	0.130592	0.0223102	0.106979	0.0013265	https://agupubs.onlinelibrary.wiley.com/doi/full/10.1029/2022PA004492
ancora	169.865	petm onset/body	0.732352	0.0653801	0.253935	0.248022	0.259816	0.253947	0.00825881	0.733816	0.719971	0.748075	0.734175	0.0181431	0.0124843	0.00934436	0.0157128	0.0127335	0.00411098	2.65	11.2	0.47	0.139496	0.035423	0.102364	0.00174152	https://agupubs.onlinelibrary.wiley.com/doi/full/10.1029/2022PA004493
ancora	170.147	petm onset/body	0.961289	0.0656286	0.0247426	0.0177462	0.03175	0.0247286	0.00813968	0.97421	0.950857	0.998898	0.975181	0.0291782	0.0011395	0.000798893	0.00161078	0.00124956	0.000590254	2.65	11.2	0.48	0.142464	0.00352493	0.13879	0.000162338	https://agupubs.onlinelibrary.wiley.com/doi/full/10.1029/2022PA004494
ancora	170.249	petm onset/body	0.933133	0.068458	0.0532315	0.0464009	0.060012	0.053201	0.00795282	0.944185	0.922117	0.96723	0.945007	0.0275283	0.00279086	0.00212976	0.00354434	0.00290282	0.000991736	2.65	11.2	0.48	0.142464	0.00758358	0.134512	0.000397598	https://agupubs.onlinelibrary.wiley.com/doi/full/10.1029/2022PA004495
ancora	170.459	petm onset/body	0.569211	0.0795088	0.41044	0.403703	0.417426	0.410602	0.00981909	0.561087	0.551603	0.570573	0.561205	0.0130902	0.0284315	0.0231953	0.0339254	0.0289403	0.00723233	2.65	11.2	0.46	0.136528	0.0560365	0.0766041	0.00388169	https://agupubs.onlinelibrary.wiley.com/doi/full/10.1029/2022PA004496
ancora	170.726	petm onset/body	0.720187	0.0871903	0.263691	0.257893	0.269581	0.263744	0.00823464	0.715048	0.701807	0.728827	0.715477	0.0175946	0.0212172	0.017725	0.0249681	0.0216155	0.00500946	2.65	11.2	0.46	0.136528	0.0360012	0.0976241	0.00289675	https://agupubs.onlinelibrary.wiley.com/doi/full/10.1029/2022PA004497
ancora	170.787	petm onset/body	0.768904	0.082919	0.216525	0.210718	0.222187	0.216511	0.00797292	0.767475	0.752606	0.783067	0.768009	0.0194702	0.0160554	0.0132282	0.0190578	0.0163656	0.00400333	2.65	11.2	0.48	0.142464	0.0308471	0.109338	0.00228732	https://agupubs.onlinelibrary.wiley.com/doi/full/10.1029/2022PA004498
ancora	170.985	petm onset/body	0.571222	0.1744	0.383402	0.376281	0.390671	0.383477	0.0102991	0.528537	0.518481	0.538636	0.528543	0.0141792	0.0868665	0.0768248	0.0994436	0.0886848	0.0146544	2.65	11.2	0.54	0.160272	0.0614487	0.0847097	0.0139223	https://agupubs.onlinelibrary.wiley.com/doi/full/10.1029/2022PA004499
ancora	171.092	petm onset/body	0.778895	0.0467939	0.208983	0.203005	0.214694	0.208898	0.00808098	0.786448	0.770776	0.802484	0.786893	0.0200782	0.00503421	0.00251748	0.0075592	0.0051172	0.00306816	2.65	11.2	0.51	0.151368	0.0316333	0.119043	0.000762019	https://agupubs.onlinelibrary.wiley.com/doi/full/10.1029/2022PA004500
ancora	171.305	petm onset/body	0.885798	0.0750294	0.100797	0.0943832	0.107061	0.100771	0.00778312	0.893135	0.87312	0.913623	0.893813	0.0249228	0.0063066	0.00499548	0.0076919	0.00645191	0.0018226	2.65	11.2	0.44	0.130592	0.0131633	0.116636	0.000823592	https://agupubs.onlinelibrary.wiley.com/doi/full/10.1029/2022PA004501
ancora	171.473	petm onset/body	0.506932	0.113057	0.458693	0.451123	0.466305	0.458812	0.0108726	0.48578	0.477455	0.494159	0.485833	0.011749	0.0551731	0.0479805	0.0630245	0.0560705	0.0104958	2.65	11.2	0.44	0.130592	0.0599016	0.0634389	0.00720516	https://agupubs.onlinelibrary.wiley.com/doi/full/10.1029/2022PA004502
ancora	171.61	petm onset/body	0.906592	0.151766	0.0791153	0.0726602	0.0854913	0.0791014	0.00768045	0.906209	0.885767	0.927539	0.907003	0.0259711	0.0146106	0.0126381	0.0169119	0.0149499	0.00305	2.65	0.8	0.45	0.00954	0.00075476	0.00864524	0.000139385	https://agupubs.onlinelibrary.wiley.com/doi/full/10.1029/2022PA004503
ancora	171.747	petm onset/body	0.357122	0.119615	0.588335	0.577718	0.598669	0.588312	0.0147689	0.33422	0.328107	0.340487	0.33426	0.00880447	0.0769045	0.0674491	0.0873908	0.0781472	0.0139268	2.65	0.8	0.47	0.009964	0.00586217	0.00333017	0.000766276	https://agupubs.onlinelibrary.wiley.com/doi/full/10.1029/2022PA004504
ancora	171.922	petm onset/body	0.788409	0.200392	0.189468	0.183957	0.194905	0.189494	0.00749412	0.757042	0.741922	0.772767	0.757421	0.0205285	0.0525766	0.0461907	0.0609251	0.0539513	0.00954012	2.65	0.8	0.45	0.00954	0.00180752	0.00722218	0.000501581	https://agupubs.onlinelibrary.wiley.com/doi/full/10.1029/2022PA004505
ancora	172.079	petm onset/body	0.558641	0.170099	0.395285	0.388035	0.402704	0.395358	0.0105007	0.517196	0.507473	0.526984	0.517215	0.0138042	0.0863233	0.076385	0.0987685	0.0881296	0.0145632	2.65	0.8	0.38	0.008056	0.00318442	0.00416653	0.000695421	https://agupubs.onlinelibrary.wiley.com/doi/full/10.1029/2022PA004506
ancora	172.22	petm onset/body	0.680849	0.143345	0.293659	0.287796	0.299574	0.29372	0.00838689	0.655938	0.643873	0.668053	0.656067	0.0163788	0.0500232	0.0439795	0.0571898	0.0509953	0.00894692	2.65	0.8	0.43	0.009116	0.002677	0.00597953	0.000456011	https://agupubs.onlinelibrary.wiley.com/doi/full/10.1029/2022PA004507
ancora	172.372	petm onset/body	0.442298	0.118847	0.514353	0.50562	0.522875	0.514343	0.0123666	0.41861	0.411347	0.426104	0.418668	0.010477	0.0665894	0.0583103	0.0758662	0.0676962	0.0122368	2.65	0.8	0.38	0.008056	0.00414363	0.00337232	0.000536444	https://agupubs.onlinelibrary.wiley.com/doi/full/10.1029/2022PA004508
ancora	172.532	pre-PETM	0.583877	0.127005	0.384951	0.378326	0.391764	0.385122	0.00959669	0.559621	0.549894	0.569391	0.559655	0.0136245	0.0549291	0.0481848	0.0626799	0.0559546	0.0100202	2.65	0.8	0.45	0.00954	0.00367243	0.00533878	0.000524024	https://agupubs.onlinelibrary.wiley.com/doi/full/10.1029/2022PA004509
ancora	172.837	pre-PETM	0.94906	0.193295	0.0368412	0.0300282	0.043631	0.0367967	0.00792177	0.953572	0.93098	0.977169	0.95439	0.028684	0.00965852	0.00780595	0.0117333	0.00994034	0.0028147	2.65	0.8	0.46	0.009752	0.000359275	0.00929923	9.41899e-05	https://agupubs.onlinelibrary.wiley.com/doi/full/10.1029/2022PA004510
ancora	173.18	pre-PETM	0.655748	0.244061	0.29668	0.289966	0.303648	0.29674	0.00965442	0.589924	0.576833	0.603135	0.589821	0.018449	0.111124	0.0977324	0.129225	0.114161	0.0195048	2.65	0.8	0.43	0.009116	0.00270453	0.00537775	0.00101301	https://agupubs.onlinelibrary.wiley.com/doi/full/10.1029/2022PA004511
ancora	173.477	pre-PETM	0.672106	0.186357	0.294352	0.288355	0.300445	0.294449	0.00860245	0.630987	0.618922	0.64327	0.631153	0.0167799	0.0734794	0.0647596	0.0844785	0.0751564	0.012702	2.65	0.8	0.42	0.008904	0.00262091	0.00561831	0.000654261	https://agupubs.onlinelibrary.wiley.com/doi/full/10.1029/2022PA004512
ancora	174.087	pre-PETM	0.433165	0.14972	0.508354	0.498936	0.517519	0.508276	0.013243	0.398421	0.390893	0.406091	0.39849	0.010801	0.0922582	0.0816958	0.104912	0.0939245	0.0155226	2.65	0.8	0.39	0.008268	0.00420307	0.00329414	0.000762791	https://agupubs.onlinelibrary.wiley.com/doi/full/10.1029/2022PA004513
ancora	174.696	pre-PETM	0.801279	0.135347	0.181841	0.176172	0.187361	0.181803	0.00764631	0.789587	0.773728	0.805925	0.790067	0.0207058	0.0284816	0.0248474	0.0326684	0.0290356	0.00535828	2.65	0.8	0.38	0.008056	0.00146491	0.00636091	0.000229448	https://agupubs.onlinelibrary.wiley.com/doi/full/10.1029/2022PA004514
ancora	175.275	pre-PETM	0.69336	0.321325	0.251582	0.243868	0.259191	0.251416	0.0105285	0.597886	0.579236	0.614577	0.596407	0.0241455	0.148116	0.128781	0.175023	0.152896	0.0284497	2.65	0.8	0.42	0.008904	0.00224009	0.00532358	0.00131882	https://agupubs.onlinelibrary.wiley.com/doi/full/10.1029/2022PA004515

## Sheet: Sheet 3
Sheet 3	Lipid biomarker data and OC burial fluxes from the High Arctic (source data: Fig.1)
site	depth	age	TAR	BIT	algal_median	algal_25pctile	algal_75pctile	algal_mean	algal_std	plant_median	plant_25pctile	plant_75pctile	plant_mean	plant_std	soil_median	soil_25pctile	soil_75pctile	soil_mean	soil_std	DBD(g/cm-3)	LSR (cm/kyr-1)	TOC (wt%)	TOC MAR (g/cm2/kyr-1)	MARalgal (g/cm2/kyr-1)	MARplant (g/cm2/kyr-1)	MARsoil (g/cm2/kyr-1)	LSRref
acex	367.42	early Eocene	0.67592	0.1751	0.301986	0.296758	0.307702	0.302176	0.00766859	0.631542	0.620767	0.643368	0.632057	0.0159779	0.0635067	0.0558505	0.0737903	0.0652665	0.0127713	2.65		0.1782
acex	367.62	early Eocene	0.442413	0.1822	0.493763	0.483617	0.504137	0.493617	0.015131	0.392572	0.384324	0.400778	0.392314	0.0120168	0.110645	0.0976663	0.127591	0.113211	0.0207384	2.65		0.1822
acex	367.82	early Eocene	0.306468	0.1842	0.596312	0.582796	0.610708	0.596236	0.0210078	0.263767	0.257914	0.270276	0.263829	0.00929332	0.136138	0.120438	0.155816	0.138949	0.024637	2.65		0.1842
acex	368.02	early Eocene	1	0.195	0	0	0	0	0	0.999333	0.974942	1.02611	1.00037	0.0292199	1.45164e-06	3.13249e-07	3.10257e-06	1.85102e-06	1.6674e-06	2.65		0.195
acex	368.19	early Eocene	0.574054	0.460778	0.285167	0.256664	0.304609	0.279403	0.0298899	0.385118	0.347126	0.411665	0.377382	0.0403587	0.329892	0.281914	0.394763	0.342954	0.0697152	2.65		0.460778
acex	368.42	early Eocene	0	0.189	0.803472	0.780914	0.831164	0.804232	0.0378088	1.92196e-17	0	1.39349e-16	9.02375e-17	1.34198e-16	0.190673	0.169842	0.216798	0.194666	0.0321624	2.65		0.159
acex	368.62	early Eocene	0.74806	0.113	0.244271	0.239765	0.249241	0.244543	0.00591179	0.727954	0.71485	0.742613	0.728798	0.0174952	0.0256059	0.0209057	0.0314354	0.0262994	0.00704749	2.65		0.113
acex	368.82	early Eocene	0.286961	0.0638	0.693802	0.681259	0.708913	0.694908	0.0191639	0.279598	0.274523	0.285601	0.280031	0.00772277	0.0231171	0.0105711	0.0375104	0.0238856	0.0156581	2.65		0.0638
acex	369.11	early Eocene	0.647374	0.22925	0.315146	0.308807	0.321727	0.315237	0.00930712	0.580175	0.568651	0.592276	0.580271	0.0170887	0.101618	0.089201	0.117777	0.10397	0.0189805	2.65		0.2755
acex	369.32	early Eocene	0.880687	0.1085	0.116912	0.114456	0.119745	0.117094	0.00312255	0.869897	0.851395	0.891179	0.871129	0.0227058	0.0114527	0.00914913	0.0142399	0.0117734	0.0033439	2.65		0.1085
acex	369.52	early Eocene	0.492064	0.124	0.476037	0.468545	0.485252	0.476779	0.0120661	0.462134	0.454643	0.470942	0.462732	0.0116961	0.0583569	0.0488014	0.06945	0.0596361	0.0141526	2.65		0.124
acex	369.73	early Eocene	0.658402	0.3906	0.266766	0.252135	0.277169	0.264301	0.0161677	0.515937	0.487689	0.535422	0.510815	0.03122	0.216133	0.185871	0.258491	0.224543	0.0451008	2.65		0.3604
acex	369.94	early Eocene	0.730386	0.152	0.256708	0.251965	0.261736	0.256857	0.00630238	0.697843	0.685086	0.711424	0.698246	0.0170304	0.0434166	0.0375291	0.0507272	0.0445052	0.00941506	2.65		0.152
acex	370.12	early Eocene	0.7261	0.196667	0.254826	0.250347	0.25997	0.255064	0.00660459	0.677892	0.665837	0.691459	0.67848	0.0174766	0.0642849	0.0566155	0.0749124	0.0660683	0.0126299	2.65		0.196667
acex	370.31	early Eocene	0.946571	0.131667	0.0520963	0.0508692	0.0534868	0.0521756	0.00156424	0.940206	0.917407	0.964058	0.940809	0.0259987	0.00701202	0.0058858	0.0083461	0.0072143	0.00174071	2.65		0.131667
acex	370.52	early Eocene	0.755507	0.37075	0.20629	0.199023	0.212117	0.205352	0.00915969	0.640039	0.616778	0.657994	0.636991	0.0283431	0.151122	0.129243	0.182263	0.15742	0.033008	2.65		0.37075
acex	370.72	early Eocene	0.336902	0.1717	0.581277	0.568854	0.594653	0.581589	0.0190118	0.295864	0.289447	0.302671	0.295907	0.00966979	0.119193	0.105226	0.136865	0.121524	0.0223969	2.65		0.1814
acex	370.91	early Eocene	0.630682	0.206	0.334006	0.327806	0.340705	0.334219	0.00933471	0.572307	0.561222	0.583257	0.572192	0.0159411	0.0908871	0.0799153	0.105022	0.0930224	0.0171642	2.65		0.207
acex	371.12	early Eocene	0.792946	0.54	0.151444	0.135151	0.161236	0.1469	0.0177973	0.582542	0.519617	0.620274	0.565125	0.0684197	0.265541	0.214192	0.346977	0.288041	0.0853358	2.65		0.54
acex	371.31	early Eocene	0.405268	0.5308	0.298716	0.244324	0.337471	0.288317	0.0567585	0.203836	0.166895	0.230371	0.196776	0.0387329	0.496556	0.430412	0.587354	0.514854	0.0963005	2.65		0.5308
acex	371.52	early Eocene	0.545719	0.62	0.199644	0.137943	0.240046	0.184923	0.0635459	0.240565	0.166143	0.289365	0.2226	0.0764858	0.55809	0.46805	0.697484	0.592835	0.141651	2.65		0.62
acex	371.72	early Eocene	0.703256	0.52825	0.199131	0.174126	0.215185	0.192991	0.0263928	0.473472	0.414013	0.51142	0.458814	0.062722	0.327911	0.27012	0.4134	0.348175	0.0888191	2.65		0.5195
acex	371.95	early Eocene	0.966308	0.5472	0.030711	0.0296906	0.0315991	0.0306415	0.00135525	0.904577	0.88075	0.932298	0.903881	0.0367888	0.0565538	0.0430998	0.0821328	0.0657753	0.0279272	2.65		0.5472
acex	372.14	early Eocene	0.791947	0.556	0.148366	0.129563	0.159122	0.143042	0.0199166	0.567654	0.496699	0.609542	0.546938	0.0761105	0.284119	0.227997	0.375022	0.310133	0.0954617	2.65		0.556
acex	372.14	early Eocene	0.881721	0.556	0.0956925	0.0879467	0.10018	0.0932171	0.00908143	0.719908	0.659831	0.752351	0.700424	0.0681005	0.183751	0.143346	0.254651	0.206545	0.0750397	2.65		0.556
acex	372.29	early Eocene	0.885894	0.469353	0.0991289	0.0952713	0.102335	0.0985964	0.00483365	0.776106	0.74621	0.800993	0.771799	0.0375657	0.120475	0.0980299	0.155763	0.129676	0.0367581	2.65		0.466882
acex	372.69	early Eocene	0.903631	0.3854	0.0883284	0.0864168	0.0907115	0.0884792	0.0028704	0.83707	0.8188	0.859039	0.83777	0.0265966	0.0701722	0.0588525	0.0865805	0.0738263	0.01772	2.65		0.3854
acex	373.07	early Eocene	1	0.524	0	0	0	0	0	0.999333	0.974937	1.02611	1.00036	0.0292202	6.5605e-06	1.41045e-06	1.43902e-05	1.02534e-05	1.18346e-05	2.65		0.524
acex	373.29	early Eocene	0.882434	0.463032	0.102181	0.0982981	0.105457	0.10168	0.00488675	0.773215	0.744391	0.797761	0.769309	0.0367109	0.120275	0.0981567	0.154639	0.129071	0.0358686	2.65		0.46371
acex	373.49	early Eocene	0.803207	0.477258	0.157044	0.146916	0.163551	0.15469	0.0112824	0.644572	0.601417	0.670225	0.634375	0.0461972	0.198191	0.163007	0.250811	0.210884	0.0550533	2.65		0.477258
acex	373.69	early Eocene	0.971831	0.490806	0.0261905	0.0254648	0.0268928	0.026194	0.000982085	0.933364	0.911398	0.958689	0.934691	0.02914	0.0355451	0.0281443	0.0481182	0.0394018	0.0134967	2.65		0.490806
acex	373.79	early Eocene	0.834546	0.496903	0.133741	0.125022	0.139176	0.131574	0.0098304	0.678498	0.633376	0.705862	0.667424	0.0497708	0.186825	0.151645	0.241319	0.201019	0.0570009	2.65		0.497581
acex	373.99	early Eocene	0.75879	0.5406	0.169028	0.14856	0.181506	0.163534	0.0218303	0.534117	0.469071	0.573903	0.516439	0.0689054	0.29737	0.241813	0.383775	0.320072	0.0902156	2.65		0.5406
acex	374.19	early Eocene	0.770559	0.591267	0.148911	0.121248	0.164467	0.140669	0.0285731	0.501728	0.409783	0.553742	0.474354	0.0963211	0.348435	0.278672	0.468053	0.385218	0.125164	2.65		0.591267
acex	374.39	early Eocene	0.924165	0.533933	0.0661046	0.062987	0.0684481	0.0654651	0.00390123	0.816106	0.777936	0.844688	0.807741	0.0476648	0.112751	0.0879461	0.156536	0.126998	0.0464602	2.65		0.533933
acex	374.57	early Eocene	0.852141	0.482333	0.12312	0.116592	0.127705	0.121818	0.0076214	0.714578	0.674884	0.740092	0.706522	0.0440682	0.159791	0.130163	0.205607	0.171685	0.0481187	2.65		0.482333
acex	374.79	early Eocene	0.636533	0.429667	0.267013	0.247204	0.28035	0.263117	0.0210817	0.468617	0.43443	0.492494	0.461979	0.0369947	0.264206	0.225604	0.316998	0.274609	0.0567261	2.65		0.434333
acex	374.79	early Eocene	0.708676	0.429667	0.225494	0.211401	0.235151	0.222784	0.0154623	0.550189	0.51586	0.573566	0.543689	0.0376994	0.223572	0.189083	0.27155	0.233297	0.0511211	2.65		0.434333
acex	374.98	early Eocene	0.891683	0.518333	0.0916624	0.0865131	0.0951412	0.0904953	0.00600022	0.76098	0.717519	0.789056	0.751451	0.049602	0.143736	0.114073	0.19255	0.158185	0.0517671	2.65		0.523
acex	374.98	early Eocene	0.740879	0.518333	0.184246	0.164715	0.196537	0.179228	0.0210013	0.528854	0.473132	0.56447	0.514301	0.0602315	0.287623	0.23608	0.364607	0.306444	0.0804954	2.65		0.523
acex	375.19	early Eocene	0.851727	0.543095	0.116494	0.106705	0.122585	0.113618	0.0114236	0.674151	0.616187	0.708098	0.656795	0.0659454	0.20793	0.165293	0.280087	0.229711	0.0756178	2.65		0.543095
acex	375.19	early Eocene	0.740722	0.543095	0.177052	0.153897	0.191355	0.170974	0.0242841	0.507644	0.441721	0.548485	0.490214	0.0695974	0.315567	0.25753	0.405111	0.338855	0.0935519	2.65		0.543095
acex	375.33	early Eocene	0.656205	0.51754	0.223784	0.195383	0.242762	0.21733	0.0298742	0.428668	0.374202	0.464202	0.41595	0.0571583	0.347963	0.2905	0.43074	0.366648	0.0868576	2.65		0.51754
acex	375.52	early Eocene	0.742592	0.482857	0.192457	0.176674	0.202848	0.188868	0.0170733	0.557303	0.512197	0.586622	0.546845	0.049396	0.249502	0.207275	0.311884	0.264181	0.0650861	2.65		0.482857
acex	375.72	early Eocene	0.953384	0.4554	0.0433035	0.0421751	0.0444291	0.0433082	0.00148485	0.902211	0.882411	0.927408	0.903844	0.0287296	0.0491161	0.0396727	0.0638839	0.0530736	0.0158143	2.65		0.4554
acex	375.92	early Eocene	0.947859	0.5094	0.0472846	0.0458826	0.0485859	0.0472159	0.00197487	0.874476	0.85055	0.901672	0.873984	0.0351436	0.0707885	0.0556467	0.0971498	0.0790316	0.0276864	2.65		0.5094
acex	376.1	early Eocene	0.976282	0.508667	0.0219851	0.0213242	0.0225714	0.021972	0.000877091	0.940026	0.917958	0.965898	0.941498	0.0295499	0.0327664	0.0256086	0.0453657	0.0368336	0.0135877	2.65		0.508667
acex	377.57	early Eocene	0.901799	0.370246	0.0903848	0.0884772	0.092812	0.0905858	0.00284951	0.838625	0.820995	0.860292	0.839855	0.0258362	0.0663764	0.0559416	0.0813074	0.0696275	0.0162244	2.65		0.444068
acex	377.77	early Eocene	0.836614	0.355482	0.145905	0.142362	0.149662	0.145812	0.00502298	0.750888	0.733363	0.770725	0.750918	0.0256696	0.0988655	0.0841365	0.119771	0.103177	0.0223889	2.65		0.429304
acex	377.82	early Eocene	0.978948	0.351791	0.0198648	0.0192525	0.0204269	0.0198641	0.000796959	0.966243	0.941791	0.99042	0.966594	0.0275631	0.0132163	0.0110743	0.0161974	0.0138431	0.00332597	2.65		0.425613
acex	377.96	early Eocene	0.884511	0.341455	0.106406	0.104185	0.109154	0.106642	0.00324417	0.822091	0.805152	0.842521	0.823411	0.0246045	0.0670805	0.0570592	0.0812318	0.0699654	0.0153533	2.65		0.341455
acex	378.02	early Eocene	0.752593	0.337026	0.213547	0.207532	0.219206	0.213105	0.00815908	0.651615	0.633404	0.668876	0.650706	0.0248354	0.131094	0.112864	0.156658	0.135922	0.0273316	2.65		0.337026
acex	378.25	early Eocene	0.835356	0.3396	0.148145	0.144621	0.151848	0.148109	0.00485399	0.755349	0.739008	0.774907	0.755752	0.0245623	0.0923125	0.0789505	0.111089	0.0960373	0.0203649	2.65		0.3396
acex	378.43	early Eocene	0.855294	0.4054	0.127228	0.123434	0.13084	0.126966	0.00507103	0.756539	0.735324	0.778677	0.755317	0.0299528	0.111714	0.0935872	0.137826	0.117686	0.0281385	2.65		0.4054
acex	378.66	petm recovery	0.944278	0.348	0.0528682	0.051583	0.0541763	0.0528732	0.00160616	0.909566	0.889309	0.932423	0.911276	0.0258063	0.0344202	0.029025	0.0420559	0.0360391	0.00833362	2.65	5	0.348	0.04611	0.00243775	0.0419401	0.00158712	https://agupubs.onlinelibrary.wiley.com/doi/full/10.1029/2023PA004774
acex	378.66	petm recovery	0.943182	0.348	0.0538872	0.0525827	0.0552037	0.0538919	0.00163389	0.907777	0.887712	0.930783	0.90956	0.0257685	0.0350835	0.0295836	0.0428652	0.0367321	0.00848692	2.65	5	0.348	0.04611	0.00248474	0.0418576	0.0016177	https://agupubs.onlinelibrary.wiley.com/doi/full/10.1029/2023PA004775
acex	378.83	petm recovery	0.959899	0.1923	0.0387902	0.0378561	0.0397991	0.0388316	0.00123467	0.950953	0.927807	0.974666	0.951675	0.0265961	0.00944341	0.00820965	0.0110703	0.0097331	0.00199772	2.65	5	0.1923	0.0254797	0.000988364	0.0242301	0.000240616	https://agupubs.onlinelibrary.wiley.com/doi/full/10.1029/2023PA004776
acex	379.06	petm recovery	0.95333	0.199	0.0451707	0.0441172	0.0463882	0.0452411	0.00138939	0.942169	0.919641	0.965322	0.943012	0.026179	0.0116317	0.0100986	0.0136106	0.0119646	0.00243721	2.65	5	0.199	0.0263675	0.00119104	0.0248426	0.000306699	https://agupubs.onlinelibrary.wiley.com/doi/full/10.1029/2023PA004777
acex	380.65	petm recovery	0.892222	0.32865	0.100264	0.098005	0.102673	0.100388	0.00296593	0.836976	0.819678	0.857659	0.838313	0.0242404	0.0588674	0.050336	0.0710482	0.0613349	0.013273	2.65	5	0.32865	0.0435461	0.00436613	0.036447	0.00256345	https://agupubs.onlinelibrary.wiley.com/doi/full/10.1029/2023PA004778
acex	380.85	petm recovery	0.967399	0.34815	0.0310261	0.0302356	0.0318092	0.0310334	0.00104659	0.947255	0.924252	0.971192	0.948041	0.0268492	0.0202217	0.017007	0.0247291	0.0211876	0.00499235	2.65	5	0.34815	0.0461299	0.00143123	0.0436968	0.000932825	https://agupubs.onlinelibrary.wiley.com/doi/full/10.1029/2023PA004779
acex	381.05	petm recovery	0.819564	0.2805	0.16562	0.162375	0.169595	0.165905	0.00477615	0.756249	0.741679	0.774135	0.757483	0.0216083	0.0743398	0.0643552	0.0872391	0.0764572	0.0150842	2.65	5	0.2805	0.0371663	0.00615546	0.0281069	0.00276293	https://agupubs.onlinelibrary.wiley.com/doi/full/10.1029/2023PA004780
acex	381.25	petm recovery	0.940987	0.2378	0.0569497	0.0555667	0.0584002	0.0569806	0.00167643	0.922415	0.900566	0.945129	0.92319	0.0253643	0.0194489	0.0167895	0.022826	0.0200065	0.00404779	2.65	5	0.2378	0.0315085	0.0017944	0.0290639	0.000612804	https://agupubs.onlinelibrary.wiley.com/doi/full/10.1029/2023PA004781
acex	381.44	petm recovery	0.89231	0.29345	0.101347	0.0990705	0.10377	0.101452	0.0028756	0.846413	0.828866	0.867682	0.847978	0.0234762	0.0489792	0.0421083	0.0582146	0.0506028	0.0104696	2.65	5	0.29345	0.0388821	0.0039406	0.0329103	0.00190442	https://agupubs.onlinelibrary.wiley.com/doi/full/10.1029/2023PA004782
acex	381.65	petm core/body	0.822806	0.2161	0.167307	0.163856	0.171016	0.167508	0.00440234	0.781201	0.765775	0.798334	0.781951	0.0203193	0.0489508	0.0428842	0.0572052	0.050382	0.00976415	2.65	5	0.2161	0.0286333	0.00479054	0.0223683	0.00140162	https://agupubs.onlinelibrary.wiley.com/doi/full/10.1029/2023PA004783
acex	381.87	petm core/body	0.879027	0.28825	0.113405	0.110934	0.116132	0.113555	0.00320484	0.829968	0.813254	0.850679	0.831545	0.0230205	0.0532586	0.0458357	0.0630654	0.0548965	0.0112196	2.65	5	0.28825	0.0381931	0.00433127	0.0316991	0.00203411	https://agupubs.onlinelibrary.wiley.com/doi/full/10.1029/2023PA004784
acex	382.06	petm core/body	0.955571	0.2074	0.0429527	0.0419504	0.0440956	0.043017	0.00133485	0.944253	0.92157	0.967457	0.945066	0.0262908	0.0118207	0.0102497	0.013836	0.0121418	0.0024659	2.65	5	0.2074	0.0274805	0.00118036	0.0259485	0.000324839	https://agupubs.onlinelibrary.wiley.com/doi/full/10.1029/2023PA004785
acex	382.26	petm core/body	0.760975	0.2298	0.220468	0.216584	0.225273	0.220798	0.00597767	0.70475	0.691714	0.720243	0.705704	0.018987	0.0713678	0.0623336	0.0831404	0.0731968	0.0138596	2.65	5	0.2298	0.0304485	0.00671293	0.0214586	0.00217304	https://agupubs.onlinelibrary.wiley.com/doi/full/10.1029/2023PA004786
acex	382.46	petm core/body	0.631734	0.217	0.330576	0.324113	0.337313	0.330729	0.00953444	0.568698	0.557736	0.580285	0.568784	0.0163579	0.0978193	0.0858296	0.112756	0.0999297	0.0182746	2.65	5	0.217	0.0287525	0.00950489	0.0163515	0.00281255	https://agupubs.onlinelibrary.wiley.com/doi/full/10.1029/2023PA004787
acex	382.66	petm core/body	0.562111	0.1482	0.406899	0.400146	0.414631	0.407413	0.0103499	0.523855	0.514717	0.533394	0.524108	0.0132886	0.0660813	0.05735	0.0772539	0.0677553	0.0141314	2.65	5	0.1482	0.0196365	0.00799007	0.0102867	0.00129761	https://agupubs.onlinelibrary.wiley.com/doi/full/10.1029/2023PA004788
acex	382.85	petm core/body	0.621237	0.12555	0.359919	0.354203	0.366773	0.360526	0.00865589	0.591902	0.582292	0.603159	0.592787	0.0141891	0.0449486	0.0376624	0.0535696	0.0460566	0.01099	2.65	5	0.12555	0.0166354	0.00598739	0.00984651	0.000747737	https://agupubs.onlinelibrary.wiley.com/doi/full/10.1029/2023PA004789
acex	383.06	petm core/body	0.58828	0.101	0.395811	0.389391	0.403142	0.396425	0.00936579	0.567045	0.557663	0.577418	0.567715	0.0133788	0.0341565	0.0265764	0.0430418	0.0351535	0.010523	2.65	5	0.101	0.0133825	0.00529693	0.00758848	0.000457099	https://agupubs.onlinelibrary.wiley.com/doi/full/10.1029/2023PA004790
acex	383.23	petm core/body	0.7581	0.0815	0.237419	0.23302	0.24233	0.237689	0.00575155	0.747112	0.733172	0.762147	0.74779	0.0179575	0.0137044	0.00926424	0.0188195	0.0141822	0.00585227	2.65	5	0.0815	0.0107987	0.00256383	0.00806787	0.00014799	https://agupubs.onlinelibrary.wiley.com/doi/full/10.1029/2023PA004791
acex	383.38	petm core/body	0.483119	0.0884	0.497284	0.489248	0.506885	0.498061	0.0121131	0.465748	0.458183	0.474534	0.466371	0.0113289	0.0335486	0.0244315	0.0442761	0.034672	0.0123644	2.65	5	0.0884	0.011713	0.00582469	0.00545531	0.000392955	https://agupubs.onlinelibrary.wiley.com/doi/full/10.1029/2023PA004792
acex	383.58	petm core/body	0.60737	0.0914	0.380382	0.373823	0.38712	0.380728	0.00891538	0.589806	0.579828	0.60031	0.590364	0.0137845	0.0272589	0.0202275	0.0356442	0.0282333	0.00967294	2.65	5	0.0914	0.0121105	0.00460661	0.00714285	0.000330119	https://agupubs.onlinelibrary.wiley.com/doi/full/10.1029/2023PA004793
acex	383.78	petm core/body	0.700655	0.085	0.292477	0.287412	0.298166	0.292884	0.00691487	0.686973	0.674943	0.700108	0.687677	0.0161511	0.0182461	0.0128789	0.0246756	0.0189619	0.00728836	2.65	5	0.085	0.0112625	0.00329402	0.00773703	0.000205497	https://agupubs.onlinelibrary.wiley.com/doi/full/10.1029/2023PA004794
acex	383.98	petm core/body	0.465304	0.1043	0.507605	0.499426	0.517232	0.508334	0.0126996	0.442453	0.435419	0.450994	0.443138	0.0110595	0.0464279	0.0368658	0.0579282	0.0476174	0.0135469	2.65	5	0.1054	0.0139655	0.00708896	0.00617908	0.000648389	https://agupubs.onlinelibrary.wiley.com/doi/full/10.1029/2023PA004795
acex	384.18	petm core/body	0.745092	0.1158	0.246799	0.242276	0.251779	0.247083	0.00597052	0.724074	0.711067	0.738555	0.724875	0.0173959	0.0269511	0.022156	0.0328473	0.0276764	0.00723386	2.65	5	0.1158	0.0153435	0.00378676	0.0111098	0.000413524	https://agupubs.onlinelibrary.wiley.com/doi/full/10.1029/2023PA004796
acex	384.38	petm core/body	0.742997	0.087356	0.251449	0.246895	0.256637	0.251808	0.00604747	0.729863	0.71674	0.744484	0.730633	0.0174269	0.0165223	0.0118768	0.0221363	0.0171831	0.00635324	2.65	5	0.0873562	0.0115747	0.00291044	0.00844793	0.000191241	https://agupubs.onlinelibrary.wiley.com/doi/full/10.1029/2023PA004797
acex	384.75	petm core/body	0.727115	0.090651	0.266401	0.261651	0.271745	0.266783	0.00636429	0.71255	0.700009	0.726503	0.713297	0.0169113	0.0187558	0.0138557	0.0247386	0.0195068	0.00682475	2.65	5	0.0906507	0.0120112	0.0031998	0.0085586	0.00022528	https://agupubs.onlinelibrary.wiley.com/doi/full/10.1029/2023PA004798
acex	385	petm core/body	0.695546	0.092877	0.29637	0.291234	0.302113	0.296765	0.00700702	0.679571	0.667504	0.692257	0.680067	0.0159765	0.0218476	0.0162918	0.0284133	0.0226808	0.00765037	2.65	5	0.0928767	0.0123062	0.00364718	0.00836291	0.00026886	https://agupubs.onlinelibrary.wiley.com/doi/full/10.1029/2023PA004799
acex	385.18	petm core/body	0.683041	0.094479	0.308077	0.302801	0.313915	0.308466	0.0072645	0.666047	0.65445	0.678324	0.666704	0.0156281	0.0234842	0.0176245	0.0302968	0.0243154	0.00800394	2.65	5	0.0944795	0.0125185	0.00385667	0.00833793	0.000293987	https://agupubs.onlinelibrary.wiley.com/doi/full/10.1029/2023PA004800
acex	388.06	pre-PETM	0.630977	0.2505	0.3234	0.316006	0.330576	0.322953	0.0104625	0.554359	0.54142	0.566887	0.553605	0.0178993	0.119789	0.105221	0.138989	0.122909	0.0222271	2.65	1.2	0.2505	0.0079659	0.00257617	0.00441597	0.000954224	https://agupubs.onlinelibrary.wiley.com/doi/full/10.1029/2023PA004801
acex	388.26	pre-PETM	0.922393	0.3805	0.0721331	0.0704474	0.0739207	0.0722451	0.00225095	0.867502	0.849312	0.889939	0.869124	0.02615	0.0559763	0.0467326	0.0689243	0.0587564	0.0141916	2.65	1.2	0.3805	0.0120999	0.000872803	0.0104967	0.000677307	https://agupubs.onlinelibrary.wiley.com/doi/full/10.1029/2023PA004802
acex	388.46	pre-PETM	0.853929	0.3775	0.130264	0.127025	0.133756	0.130178	0.00465609	0.765985	0.747635	0.787249	0.765915	0.0271583	0.0991254	0.0837281	0.121258	0.103862	0.023618	2.65	1.2	0.3775	0.0120045	0.00156375	0.00919526	0.00118995	https://agupubs.onlinelibrary.wiley.com/doi/full/10.1029/2023PA004803
acex	388.64	pre-PETM	0.754027	0.44215	0.194755	0.18284	0.202509	0.192304	0.0129071	0.599036	0.562975	0.622938	0.591753	0.0396673	0.20574	0.172257	0.252532	0.215782	0.0501724	2.65	1.2	0.44215	0.0140604	0.00273833	0.00842267	0.00289278	https://agupubs.onlinelibrary.wiley.com/doi/full/10.1029/2023PA004804
acex	388.9	pre-PETM	0.935008	0.40245	0.0604938	0.0590852	0.0620201	0.0605697	0.00192938	0.882067	0.86344	0.905899	0.884092	0.0268834	0.0523041	0.0434697	0.0655968	0.0555023	0.0141912	2.65	1.2	0.40245	0.0127979	0.000774194	0.0112886	0.000669383	https://agupubs.onlinelibrary.wiley.com/doi/full/10.1029/2023PA004805
acex	389.06	pre-PETM	0.918245	0.44425	0.0740597	0.0721665	0.0760843	0.0740295	0.00274789	0.840703	0.820409	0.864968	0.841084	0.0305394	0.0795465	0.0647717	0.101453	0.085016	0.0235463	2.65	1.2	0.44425	0.0141272	0.00104625	0.0118767	0.00112376	https://agupubs.onlinelibrary.wiley.com/doi/full/10.1029/2023PA004806
acex	389.26	pre-PETM	0.899711	0.467667	0.0883745	0.0853576	0.0911213	0.0880344	0.00398086	0.800547	0.772804	0.824551	0.797197	0.0356747	0.106527	0.0865199	0.138119	0.114867	0.0329963	2.65	1.2	0.467667	0.0148718	0.00131429	0.0119056	0.00158425	https://agupubs.onlinelibrary.wiley.com/doi/full/10.1029/2023PA004807
acex	389.46	pre-PETM	0.783905	0.462333	0.171936	0.16112	0.178969	0.169555	0.0118983	0.626591	0.586434	0.651386	0.617747	0.0432877	0.201289	0.166741	0.251356	0.212601	0.0527565	2.65	1.2	0.462333	0.0147022	0.00252784	0.00921226	0.0029594	https://agupubs.onlinelibrary.wiley.com/doi/full/10.1029/2023PA004808
acex	389.64	pre-PETM	0.878117	0.47595	0.104683	0.100166	0.108254	0.103916	0.00551598	0.759946	0.726926	0.784799	0.754452	0.0398248	0.131674	0.106907	0.170309	0.141694	0.0404285	2.65	1.2	0.47595	0.0151352	0.0015844	0.0115019	0.00199291	https://agupubs.onlinelibrary.wiley.com/doi/full/10.1029/2023PA004809
acex	389.84	pre-PETM	0.921429	0.4372	0.0715187	0.0698395	0.0734876	0.0715727	0.00255936	0.848712	0.828694	0.873216	0.849455	0.029609	0.0740455	0.060547	0.0940625	0.0791072	0.0216129	2.65	1.2	0.4372	0.013903	0.000994322	0.0117996	0.00102945	https://agupubs.onlinelibrary.wiley.com/doi/full/10.1029/2023PA004810
acex	390.04	pre-PETM	0.975775	0.3951	0.0228375	0.0222059	0.0234346	0.0228494	0.000860296	0.956643	0.933215	0.981316	0.957273	0.027414	0.019089	0.0157242	0.0239378	0.020168	0.00529031	2.65	1.2	0.3951	0.0125642	0.000286934	0.0120194	0.000239837	https://agupubs.onlinelibrary.wiley.com/doi/full/10.1029/2023PA004811
acex	390.24	pre-PETM	0.940434	0.3795	0.0560346	0.0546438	0.057399	0.0560349	0.00173219	0.897262	0.87734	0.920239	0.898778	0.0261953	0.0430822	0.0359814	0.0532782	0.0453648	0.0111045	2.65	1.2	0.3795	0.0120681	0.000676232	0.0108282	0.00051992	https://agupubs.onlinelibrary.wiley.com/doi/full/10.1029/2023PA004812
acex	390.46	pre-PETM	0.806419	0.45925	0.157436	0.148694	0.163472	0.155725	0.00996327	0.65979	0.622059	0.684072	0.651865	0.041625	0.181836	0.150184	0.227788	0.192339	0.0486016	2.65	1.2	0.45925	0.0146041	0.00229922	0.00963568	0.00265556	https://agupubs.onlinelibrary.wiley.com/doi/full/10.1029/2023PA004813
acex	390.63	pre-PETM	0.720396	0.4558	0.211836	0.196606	0.222137	0.208728	0.0166194	0.54802	0.508839	0.573779	0.539586	0.0429283	0.239917	0.201193	0.294446	0.251511	0.0578972	2.65	1.2	0.4558	0.0144944	0.00307045	0.00794324	0.00347747	https://agupubs.onlinelibrary.wiley.com/doi/full/10.1029/2023PA004814
acex	390.85	pre-PETM	0.84464	0.435	0.133045	0.127911	0.137276	0.132349	0.00637186	0.727706	0.699189	0.750228	0.723889	0.0346948	0.135996	0.112532	0.169547	0.143729	0.0360181	2.65	1.2	1.4558	0.0462944	0.00615926	0.0336887	0.00629584	https://agupubs.onlinelibrary.wiley.com/doi/full/10.1029/2023PA004815

## Sheet: Sheet 4
Sheet 4	Lipid biomarker data and OC burial fluxes from Denmark (source data: Fig.1)
site	depth(m)	age	TAR	BIT	algal_median	algal_25pctile	algal_75pctile	algal_mean	algal_std	plant_median	plant_25pctile	plant_75pctile	plant_mean	plant_std	soil_median	soil_25pctile	soil_75pctile	soil_mean	soil_std	DBD(g/cm-3)	LSR (cm/kyr-1)	TOC (wt%)	TOC MAR (g/cm2/kyr-1)	MARalgal (g/cm2/kyr-1)	MARplant (g/cm2/kyr-1)	MARsoil (g/cm2/kyr-1)	LSRref	Notes
fur	41	early Eocene	0.04	0.581	0.395596	0.382066	0.408792	0.395537	0.0172848	0.0180827	0.0171818	0.0190391	0.0181338	0.00127667	0.586551	0.572293	0.6009	0.586895	0.0195969	2.65		0.53572					doi.org/10.5194/cp-19-1623-2023
fur	39	early Eocene	0.19	0.743	0.216492	0.200932	0.231913	0.216389	0.0183984	0.0567347	0.0524559	0.0611979	0.0569397	0.00605706	0.726764	0.706945	0.747015	0.727298	0.027293	2.65		0.278518					doi.org/10.5194/cp-19-1623-2023
fur	38	early Eocene	0.12	0.44	0.510644	0.50038	0.521172	0.510831	0.0146707	0.0771377	0.0734522	0.0811062	0.0773605	0.00493429	0.411871	0.401655	0.422697	0.412302	0.014316	2.65		0.567404					doi.org/10.5194/cp-19-1623-2023
fur	35	early Eocene	0.07	0.774	0.193373	0.17564	0.210829	0.193206	0.0206094	0.0160008	0.0145581	0.0174724	0.0160547	0.00194405	0.790745	0.770882	0.811337	0.791448	0.0283157	2.65		0.33121					doi.org/10.5194/cp-19-1623-2023
fur	32	early Eocene	0.08																	2.65		0.352156					doi.org/10.5194/cp-19-1623-2023
fur	24.9	early Eocene	0.31																	2.65	9	0.534632	0.12751				doi.org/10.5194/cp-19-1623-2023
fur	23.9	early Eocene	0.35	0.917	0.0425885	0.0218121	0.0625747	0.0418957	0.0233417	0.0262323	0.0134211	0.0387797	0.0261292	0.0147732	0.930785	0.898746	0.96509	0.932862	0.0452211	2.65	9	0.555798	0.132558	0.00564544	0.0034773	0.123383	doi.org/10.5194/cp-19-1623-2023
fur	21.9	early Eocene	0.12	0.798	0.166532	0.148745	0.184219	0.166349	0.0207169	0.0251044	0.0224215	0.0277957	0.0251964	0.00348746	0.808469	0.787224	0.830296	0.809177	0.0300292	2.65	9	0.662446	0.157993	0.026311	0.00396633	0.127733	doi.org/10.5194/cp-19-1623-2023
fur	11.1	early Eocene	0.22	0.294	0.578807	0.568723	0.589611	0.57922	0.0147563	0.183451	0.174688	0.193054	0.184051	0.0113911	0.236972	0.230084	0.243944	0.237184	0.00971102	2.65	9	0.943535	0.225033	0.130251	0.0412824	0.0533266	doi.org/10.5194/cp-19-1623-2023
fur	8.65	early Eocene	0.61	0.114	0.322087	0.291994	0.349164	0.32001	0.0341041	0.643266	0.613164	0.676957	0.645622	0.0397917	0.0345934	0.0313342	0.0381089	0.0347977	0.00468942	2.65		1.09778					doi.org/10.5194/cp-19-1623-2023
fur	5.5	early Eocene	0.13	0.13	0.771434	0.756612	0.787223	0.771931	0.0196	0.127879	0.122058	0.134113	0.128242	0.00765741	0.100273	0.0949619	0.10585	0.100455	0.00710929	2.65		1.23146					doi.org/10.5194/cp-19-1623-2023
fur	1.71	PETM recovery	0.1	0.204	0.733173	0.719485	0.747237	0.733474	0.0179989	0.0900186	0.0859172	0.0944178	0.0902738	0.0054077	0.17673	0.170734	0.182699	0.176853	0.0084385	2.65	2.8	0.909571	0.0674902	0.049482	0.00607537	0.0119276	doi.org/10.5194/cp-19-1623-2023
fur	0.51	PETM recovery	0.08																	2.65	2.8	0.504666	0.0374462				doi.org/10.5194/cp-19-1623-2023
fur	-0.17	PETM body	0.2	0.058	0.757069	0.742399	0.773429	0.757821	0.0210818	0.212075	0.202521	0.22235	0.212712	0.012582	0.0300224	0.0248416	0.0352558	0.0300719	0.00611782	2.65	23.8	3.40336	2.1465	1.62505	0.45522	0.0644432	doi.org/10.5194/cp-19-1623-2023
fur	-2.91	PETM body	0.07	0.059	0.889801	0.870362	0.910456	0.890449	0.0242822	0.0737864	0.070453	0.0773096	0.0739794	0.00445384	0.0362689	0.0302149	0.0424401	0.0363569	0.00715227	2.65	23.8	3.13764	1.97891	1.76083	0.146017	0.0717728	doi.org/10.5194/cp-19-1623-2023
fur	-5.93	PETM body	0.38	0.053	0.573064	0.553785	0.591171	0.572493	0.0245912	0.407234	0.389079	0.427396	0.40853	0.0239003	0.01935	0.0154769	0.0233595	0.0194351	0.00467363	2.65	23.8	2.30852	1.45599	0.834374	0.592927	0.0281734	doi.org/10.5194/cp-19-1623-2023
fur	-11.13	PETM body	0.38	0.046	0.575686	0.55621	0.593946	0.575111	0.0248118	0.409127	0.390949	0.429269	0.410392	0.0239543	0.0149039	0.011019	0.0188734	0.0149576	0.00463951	2.65	23.8	2.45245	1.54676	0.890446	0.63282	0.0230527	doi.org/10.5194/cp-19-1623-2023
fur	-19.09	PETM body	0.49	0.05	0.458174	0.432807	0.48102	0.456754	0.0295412	0.52808	0.504534	0.554283	0.529724	0.031042	0.0138216	0.0107803	0.0170334	0.0139487	0.00378784	2.65	23.8	1.55102	0.978227	0.448198	0.516582	0.0135206	doi.org/10.5194/cp-19-1623-2023
fur	-22.58	PETM body	0.27	0.035	0.69742	0.681864	0.7135	0.697745	0.0221806	0.292317	0.279322	0.306476	0.293197	0.0171695	0.00958504	0.00483912	0.0143789	0.00960561	0.00553002	2.65	23.8	1.41	0.889287	0.620207	0.259953	0.00852385	doi.org/10.5194/cp-19-1623-2023
fur	-23.75	PETM body	0.49	0.058	0.456278	0.431093	0.478912	0.454842	0.0292978	0.525874	0.502342	0.552128	0.527523	0.0310273	0.0179284	0.0148537	0.021129	0.0180589	0.00387128	2.65	23.8	1.0066	0.634859	0.289672	0.333856	0.011382	doi.org/10.5194/cp-19-1623-2023
fur	-24.2	PETM body	0.56	0.075	0.379511	0.351251	0.405001	0.377714	0.0324219	0.598172	0.570976	0.628499	0.600147	0.0358481	0.0223366	0.0197166	0.0252851	0.0225635	0.00369627	2.65	23.8	1.29378	0.815986	0.309675	0.4881	0.0182263	doi.org/10.5194/cp-19-1623-2023
fur	-24.3	PETM body	0.38	0.054	0.572696	0.553441	0.590769	0.572117	0.0245597	0.406965	0.388809	0.427123	0.408263	0.0238925	0.0199935	0.0161114	0.0240024	0.020077	0.00467932	2.65	23.8	1.21777	0.768048	0.439858	0.312569	0.015356	doi.org/10.5194/cp-19-1623-2023
fur	-24.35	PETM body	0.16	0.051	0.80342	0.787585	0.820797	0.80422	0.0218034	0.17046	0.162853	0.178782	0.170987	0.0101577	0.0254197	0.0198891	0.030955	0.0254545	0.00643191	2.65	23.8	0.38	0.239666	0.192552	0.0408534	0.00609223	doi.org/10.5194/cp-19-1623-2023
fur	-24.45	PETM onset	0.36	0.429	0.413023	0.403072	0.422809	0.413065	0.013787	0.26821	0.254095	0.284233	0.269389	0.0186238	0.317758	0.307928	0.327717	0.317918	0.0139423	2.65	2.2	0.438451	0.0255617	0.0105576	0.0068559	0.00812243	doi.org/10.5194/cp-19-1623-2023
fur	-24.57	pre-PETM	0.25	0.542	0.380388	0.370588	0.390593	0.380604	0.0135535	0.143229	0.13558	0.151493	0.143715	0.0103518	0.475729	0.462834	0.489102	0.476124	0.017645	2.65		0.27					doi.org/10.5194/cp-19-1623-2023
fur	-24.58	pre-PETM	0.52	0.812	0.12905	0.115647	0.141466	0.128604	0.0154975	0.170092	0.151407	0.190103	0.171419	0.0270059	0.69946	0.670298	0.730711	0.700546	0.0403277	2.65		0.27					doi.org/10.5194/cp-19-1623-2023
fur	-24.61	latest Paleocene	0.73	0.656	0.141664	0.121634	0.158075	0.13941	0.0221243	0.559424	0.508447	0.622281	0.567314	0.0696932	0.297959	0.25544	0.332617	0.293667	0.0486372	2.65		0.2					doi.org/10.5194/cp-19-1623-2023
fur	-24.65	latest Paleocene	0.3	0.507	0.389521	0.380522	0.399053	0.389826	0.012929	0.190419	0.180137	0.201655	0.191088	0.0136234	0.419316	0.407264	0.431444	0.419494	0.016411	2.65		0.520488					doi.org/10.5194/cp-19-1623-2023
fur	-24.74	latest Paleocene	0.26	0.383	0.49339	0.48414	0.503123	0.493664	0.0135649	0.196052	0.186374	0.206896	0.196792	0.0127512	0.309794	0.301048	0.318599	0.30996	0.0121023	2.65		0.486902					doi.org/10.5194/cp-19-1623-2023
fur	-24.82	latest Paleocene	0.2	0.43	0.4868	0.477653	0.496706	0.487144	0.0135812	0.13636	0.129643	0.143724	0.136785	0.00889743	0.376191	0.366329	0.386433	0.376517	0.0136601	2.65		0.490569					doi.org/10.5194/cp-19-1623-2023

## Sheet: Sheet 5
Sheet 5	Lipid biomarker data and OC burial fluxes from Tanzania (source data: Fig.1)
site	depth	age	TAR	BIT	algal_median	algal_25pctile	algal_75pctile	algal_mean	algal_std	plant_median	plant_25pctile	plant_75pctile	plant_mean	plant_std	soil_median	soil_25pctile	soil_75pctile	soil_mean	soil_std	TOC (wt%)	LSR (cm/kyr-1)	DBD(g/cm-3)	TOC MAR (g/cm2/kyr-1)	MARalgal (g/cm2/kyr-1)	MARplant (g/cm2/kyr-1)	MARsoil (g/cm2/kyr-1)	LSRref	Note
tanzania	11.25	post-PETM	0.96	0.485714	0.0357271	0.0342098	0.0371105	0.0356656	0.00193529	0.927861	0.907534	0.948639	0.928482	0.024783	0.0344166	0.0321651	0.0367506	0.0344896	0.00316676	0.13		2.65
tanzania	12.15	post-PETM	0.95	0.755946	0.0398884	0.0385503	0.0411624	0.0398751	0.00184198	0.809431	0.788586	0.828571	0.808299	0.0286057	0.148551	0.133157	0.166233	0.1508	0.0215796	0.284375		2.65
tanzania	12.8	PETM	0.78	0.690114	0.140513	0.135464	0.145282	0.140267	0.00652637	0.505674	0.486706	0.523114	0.504491	0.0237146	0.353411	0.331557	0.376225	0.355001	0.027937	0.0466667	8.75	2.65	0.0108208	0.00152046	0.00547182	0.00382421	https://agupubs.onlinelibrary.wiley.com/doi/full/10.1029/2023PA004773	used median value
tanzania	13.15	PETM	0.94	0.697007	0.0495361	0.0481912	0.0508562	0.049532	0.00193951	0.819018	0.800705	0.836453	0.818714	0.0243512	0.129567	0.118803	0.141421	0.13067	0.0148321	0.04	8.75	2.65	0.009275	0.000459447	0.00759639	0.00120174	https://agupubs.onlinelibrary.wiley.com/doi/full/10.1029/2023PA004773
tanzania	13.43	PETM	0.94	0.861886	0.0368698	0.0324887	0.0402841	0.0360424	0.00507829	0.611792	0.53377	0.668029	0.596084	0.0846642	0.348292	0.29217	0.426026	0.367627	0.088521	0.04	8.75	2.65	0.009275	0.000341968	0.00567437	0.00323041	https://agupubs.onlinelibrary.wiley.com/doi/full/10.1029/2023PA004773
tanzania	13.65	PETM	0.91	0.766317	0.0643738	0.0620242	0.0667569	0.0643641	0.00326092	0.678372	0.648975	0.700731	0.674292	0.0338585	0.256984	0.232418	0.284733	0.260693	0.0332346	0.023125	8.75	2.65	0.00536211	0.000345179	0.0036375	0.00137797	https://agupubs.onlinelibrary.wiley.com/doi/full/10.1029/2023PA004773
tanzania	14.16	PETM	0.95	0.86	0.0325532	0.0292938	0.035125	0.0319613	0.00390752	0.663682	0.591902	0.71501	0.648243	0.0794459	0.3	0.250745	0.370412	0.319367	0.0816341	0.032	8.75	2.65	0.00742	0.000241545	0.00492452	0.002226	https://agupubs.onlinelibrary.wiley.com/doi/full/10.1029/2023PA004773
tanzania	14.65	PETM	0.96	0.90708	0.0208972	0.012865	0.0251089	0.0179083	0.00885524	0.547007	0.335935	0.655789	0.470207	0.225962	0.432772	0.318727	0.647223	0.512344	0.235358	0.05875	8.75	2.65	0.0136227	0.000284675	0.00745169	0.00589551	https://agupubs.onlinelibrary.wiley.com/doi/full/10.1029/2023PA004773
tanzania	14.92	PETM	0.8	0.837441	0.0820904	0.0701763	0.0925699	0.0806718	0.0133225	0.332781	0.284	0.375663	0.327858	0.0543852	0.585456	0.533737	0.644391	0.592158	0.0679505	0.101539	8.75	2.65	0.0235442	0.00193276	0.00783508	0.0137841	https://agupubs.onlinelibrary.wiley.com/doi/full/10.1029/2023PA004773
tanzania	16.15	PETM	0.99	0.764176	0.00680511	0.00517745	0.00818823	0.00669208	0.00175682	0.964274	0.941998	0.987061	0.964951	0.0282082	0.0262587	0.0200064	0.0327174	0.0269631	0.00866548	0.116404	8.75	2.65	0.0269913	0.000183679	0.026027	0.000708758	https://agupubs.onlinelibrary.wiley.com/doi/full/10.1029/2023PA004773
tanzania	17.25	PETM	0.97	0.651943	0.0255521	0.0241311	0.0268876	0.0254916	0.00176715	0.919698	0.899165	0.939916	0.920162	0.0252116	0.0528285	0.048052	0.0574869	0.0530296	0.00659137	0.108	8.75	2.65	0.0250425	0.000639888	0.0230315	0.00132296	https://agupubs.onlinelibrary.wiley.com/doi/full/10.1029/2023PA004773
tanzania	18.65	PETM	0.89	0.851916	0.0565242	0.0486799	0.0628836	0.0552546	0.00879893	0.470654	0.402736	0.523949	0.460277	0.0738386	0.472077	0.413975	0.544131	0.484683	0.0821725	0.07	8.75	2.65	0.0162313	0.000917459	0.0076393	0.0076624	https://agupubs.onlinelibrary.wiley.com/doi/full/10.1029/2023PA004773
tanzania	19.21	PETM	0.69	0.593174	0.207749	0.202949	0.212932	0.207825	0.00713507	0.467852	0.455879	0.478942	0.467293	0.016187	0.32379	0.308445	0.340269	0.324609	0.0203032	0.08	8.75	2.65	0.01855	0.00385374	0.00867865	0.0060063	https://agupubs.onlinelibrary.wiley.com/doi/full/10.1029/2023PA004773
tanzania	20.15	PETM	1	0.712329	0	0	0	0	0	0.997502	0.973753	1.0217	0.998317	0.0282304	0.000132919	3.50099e-05	0.000325906	0.000198094	0.000187804	0.276667	8.75	2.65	0.0641521	0	0.0639919	8.52701e-06	https://agupubs.onlinelibrary.wiley.com/doi/full/10.1029/2023PA004773
tanzania	20.35	PETM	0.97	0.592908	0.0259294	0.0244273	0.0272523	0.0258328	0.00181348	0.931505	0.910809	0.952484	0.932411	0.0252928	0.0403111	0.0369873	0.043612	0.0404052	0.00459591	0.37	8.75	2.65	0.0857938	0.00222458	0.0799173	0.00345844	https://agupubs.onlinelibrary.wiley.com/doi/full/10.1029/2023PA004773
tanzania	20.55	PETM	0.94	0.672768	0.0503371	0.0490094	0.0516521	0.0503401	0.00194438	0.832185	0.813718	0.849691	0.832052	0.023528	0.115637	0.106466	0.125487	0.116481	0.0124309	0.463333	8.75	2.65	0.107435	0.00540799	0.0894062	0.0124235	https://agupubs.onlinelibrary.wiley.com/doi/full/10.1029/2023PA004773
tanzania	20.65	PETM	0.79	0.636861	0.148248	0.144559	0.151832	0.148231	0.00516092	0.566404	0.55199	0.580082	0.566063	0.0198433	0.284057	0.26791	0.300983	0.285214	0.0210477	0.4	8.75	2.65	0.09275	0.01375	0.052534	0.0263463	https://agupubs.onlinelibrary.wiley.com/doi/full/10.1029/2023PA004773
tanzania	21.15	PETM	0.99	0.370917	0.00697069	0.0052757	0.00840678	0.00686209	0.0018416	0.986844	0.964179	1.01081	0.987739	0.0276991	0.00396348	0.00299896	0.00486828	0.00394999	0.00111261	0.086	8.75	2.65	0.0199413	0.000139004	0.0196789	7.90367e-05	https://agupubs.onlinelibrary.wiley.com/doi/full/10.1029/2023PA004773
tanzania	21.35	PETM	1	0.544893	0	0	0	0	0	0.997631	0.973837	1.02186	0.998448	0.0282336	4.53517e-05	1.20667e-05	0.000112266	6.69893e-05	6.22778e-05	0.17	8.75	2.65	0.0394188	0	0.0393254	1.78771e-06	https://agupubs.onlinelibrary.wiley.com/doi/full/10.1029/2023PA004773
tanzania	21.65	PETM	0.98	0.624977	0.0164609	0.0149251	0.0178423	0.0163973	0.00178236	0.9513	0.929997	0.972982	0.952353	0.0263054	0.0297458	0.0264983	0.032962	0.0298684	0.00443186	0.12	8.75	2.65	0.027825	0.000458024	0.0264699	0.000827676	https://agupubs.onlinelibrary.wiley.com/doi/full/10.1029/2023PA004773
tanzania	21.825	PETM	0.98	0.443872	0.016728	0.0151624	0.0182023	0.0166788	0.0018445	0.967679	0.945806	0.990744	0.968494	0.0267135	0.0134239	0.0120438	0.0147431	0.0134044	0.00180442	0.2575	8.75	2.65	0.0597078	0.00099879	0.057778	0.000801509	https://agupubs.onlinelibrary.wiley.com/doi/full/10.1029/2023PA004773
tanzania	23.15	PETM	1	0.44201	0	0	0	0	0	0.997658	0.973864	1.02186	0.998473	0.0282343	2.90492e-05	7.65568e-06	7.13629e-05	4.25145e-05	3.94538e-05	0.07	8.75	2.65	0.0162313	0	0.0161932	4.71506e-07	https://agupubs.onlinelibrary.wiley.com/doi/full/10.1029/2023PA004773
tanzania	23.35	PETM	1	0.349215	0	0	0	0	0	0.997672	0.973892	1.02187	0.998485	0.0282346	2.08557e-05	5.55269e-06	5.09884e-05	3.03767e-05	2.81829e-05	0.1	8.75	2.65	0.0231875	0	0.0231335	4.83592e-07	https://agupubs.onlinelibrary.wiley.com/doi/full/10.1029/2023PA004773
tanzania	23.55	PETM	0.94	0.572098	0.0526535	0.0512012	0.0541211	0.0527097	0.00203822	0.870801	0.852225	0.889352	0.871165	0.022784	0.0747054	0.0698819	0.0796064	0.0748797	0.00664306	0.09	8.75	2.65	0.0208687	0.00109881	0.0181725	0.00155901	https://agupubs.onlinelibrary.wiley.com/doi/full/10.1029/2023PA004773
tanzania	23.62	PETM	0.71	0.204323	0.269874	0.26556	0.274657	0.270197	0.00599372	0.668516	0.657372	0.679999	0.668713	0.014492	0.0603896	0.0549449	0.0649311	0.0599851	0.00640835	0.36	8.75	2.65	0.083475	0.0225278	0.0558044	0.00504103	https://agupubs.onlinelibrary.wiley.com/doi/full/10.1029/2023PA004773
tanzania	23.775	PETM	0.97	0.460227	0.0263904	0.0248352	0.0277643	0.0263103	0.00188134	0.948763	0.927685	0.971037	0.949558	0.0257634	0.0227165	0.0209198	0.0243987	0.0227351	0.00234611	0.495	8.75	2.65	0.114778	0.00302904	0.108897	0.00260736	https://agupubs.onlinelibrary.wiley.com/doi/full/10.1029/2023PA004773

## Sheet: Sheet 6
Sheet 6: Average OC burial flux data for High Arctic, New Jersey Margin, Denmark, and Tasman Sea between the latest Paleocene and PETM (source data: Fig. 3a)
	Tasman Sea				New Jersey Margin				High Arctic				Denmark
	TOC MAR (g/cm2/kyr-1)	MARalgal (g/cm2/kyr-1)	MARplant (g/cm2/kyr-1)	MARsoil (g/cm2/kyr-1)	TOC MAR (g/cm2/kyr-1)	MARalgal (g/cm2/kyr-1)	MARplant (g/cm2/kyr-1)	MARsoil (g/cm2/kyr-1)	TOC MAR (g/cm2/kyr-1)	MARalgal (g/cm2/kyr-1)	MARplant (g/cm2/kyr-1)	MARsoil (g/cm2/kyr-1)	TOC MAR (g/cm2/kyr-1)	MARalgal (g/cm2/kyr-1)	MARplant (g/cm2/kyr-1)	MARsoil (g/cm2/kyr-1)
prePETM interval	0.00828974	0.000663314	0.00752029	0.000105666	0.00893429	0.00246646	0.00580182	0.000656649	0.0154462	0.00189896	0.0116154	0.00188414	0.0255617	0.0105576	0.0068559	0.00812243
PETM interval	0.00699803	0.000543354	0.00641428	4.05662e-05	0.0976283	0.0180249	0.0771216	0.00246728	0.0247432	0.00412456	0.0195571	0.000996111	0.963264	0.678213	0.344088	0.0247701
Fold change (prePETM-to-PETM)	0.8446	0.8189	0.8528	0.3868	10.9274	7.30802	13.2927	3.75738	1.6	2.17	1.68	0.529	37.6839	64.2395	50.1886	3.04959

## Sheet: Sheet 7
Sheet 7: Average OC burial flux data for High Arctic and New Jersey Margin during the pre-PETM, PETM body and PETM recovery (source data: Fig. 3b, 3c)
	New Jersey Margin				High Arctic
	TOC MAR (g/cm2/kyr-1)	MARalgal (g/cm2/kyr-1)	MARplant (g/cm2/kyr-1)	MARsoil (g/cm2/kyr-1)	TOC MAR (g/cm2/kyr-1)	MARalgal (g/cm2/kyr-1)	MARplant (g/cm2/kyr-1)	MARsoil (g/cm2/kyr-1)
prePETM	0.00893429	0.002466	0.00580182	0.000657	0.0154462	0.001899	0.0116154	0.001884
PETM body	0.0926823	0.018292	0.072456	0.001934	0.0181537	0.00481	0.0124971	0.000798
PETM recovery	0.116706	0.016996	0.0951178	0.004523	0.0379222	0.002754	0.0336773	0.001392

## Sheet: Sheet8
Sheet 8:	DeepMIP model ensemble-derived estimates of mean annual precipitation under different CO2 scenarios (source data; Figure 3)
experiment	Site	lat	lon	geography	CO2	GMST	var	long_name	unit	annual_mean	monthly_min	monthly_max	DJF	MAM	JJA	SON	Jan	Feb	Mar	Apr	May	Jun	Jul	Aug	Sep	Oct	Nov	Dec
deepmip-eocene-p1-PI	tanzania	-9.3	39.5	modern	280	13.7	pr	Precipitation	mm/day	3.1	0.6	7.1	5	5	1.4	1	5.7	4.7	4.8	6.2	3.8	1.9	1.4	0.9	0.6	0.7	1.6	4.5
deepmip-eocene-p1-x1	tanzania	-18.9	33.7	early eocene	280	17.6	pr	Precipitation	mm/day	3.2	0.6	8.1	6	4.6	1.4	0.9	6.4	7.6	6.7	4.4	2.6	1.6	1.4	1	0.7	0.7	1.3	3.8
deepmip-eocene-p1-x2	tanzania	-20.1	35	early eocene	560	21.4	pr	Precipitation	mm/day	2.9	0.6	8	5.2	4.2	1.3	0.7	5.2	7.7	6.1	4	2.5	1.7	1.3	0.9	0.7	0.6	0.7	2.7
deepmip-eocene-p1-x3	tanzania	-18.9	33.7	early eocene	840	25	pr	Precipitation	mm/day	2.6	0.5	7.1	5	4	1	0.6	5.8	6.8	5.5	4.1	2.5	1.3	0.9	0.7	0.6	0.6	0.7	2.5
deepmip-eocene-p1-x4	tanzania	-20.9	35.9	early eocene	1120	26.2	pr	Precipitation	mm/day	2.9	0.4	8.8	5.7	4.4	1	0.5	6.8	8.2	7.1	4.1	1.9	1.3	1.1	0.7	0.5	0.4	0.5	2.1
deepmip_sens_6xCO2	tanzania	-18.9	33.7	early eocene	1680	27.8	pr	Precipitation	mm/day	2.8	0.6	6.9	4.3	4.6	1.5	0.7	5.3	5.9	5.4	5.3	3.2	2	1.4	1	0.8	0.6	0.7	1.7
deepmip-eocene-p1-x9	tanzania	-18.9	33.7	early eocene	2520	35.5	pr	Precipitation	mm/day	2.4	0.4	6.7	5.3	3.2	0.8	0.5	6.7	4.6	3.7	3.7	2.3	1.2	0.6	0.5	0.4	0.4	0.7	4.5
deepmip-eocene-p1-PI	denmark	56.8	9	modern	280	13.7	pr	Precipitation	mm/day	2.4	1.2	3.6	3.1	1.8	1.6	3.2	3.1	2.7	2.2	1.6	1.4	1.4	1.4	2	2.7	3.4	3.6	3.4
deepmip-eocene-p1-x1	denmark	52.5	4	early eocene	280	17.6	pr	Precipitation	mm/day	3.3	1.4	4.7	4.2	3	1.7	4.1	4.2	4.1	3.8	3.1	2.2	1.6	1.6	2.1	3.2	4.3	4.6	4.4
deepmip-eocene-p1-x2	denmark	51.2	5.1	early eocene	560	21.4	pr	Precipitation	mm/day	3.6	1.5	5.5	4.9	3.2	1.9	4.4	5	4.7	4.1	3.2	2.2	1.7	1.7	2.2	3.4	4.9	5.1	5.1
deepmip-eocene-p1-x3	denmark	52.5	4	early eocene	840	25	pr	Precipitation	mm/day	4.1	1.5	6.1	5.7	3.8	1.9	4.9	5.8	5.5	4.8	4	2.7	1.9	1.7	2.3	3.6	5.1	5.8	6
deepmip-eocene-p1-x4	denmark	50.4	5.9	early eocene	1120	26.2	pr	Precipitation	mm/day	4.1	1.8	6.1	5.8	3.8	2.1	4.5	6	5.4	4.7	3.9	2.7	2.1	1.9	2.3	3	4.9	5.6	6
deepmip_sens_6xCO2	denmark	52.5	4	early eocene	1680	27.8	pr	Precipitation	mm/day	4.3	1.9	6.2	6.1	3.9	2.2	5.1	6.2	5.9	5	4	2.8	2	1.9	2.6	3.9	5.5	6	6.1
deepmip-eocene-p1-x9	denmark	52.5	4	early eocene	2520	35.5	pr	Precipitation	mm/day	3.9	1.3	6	5.4	3.3	1.5	5.2	5.7	4.8	4.1	3.3	2.5	1.3	1.3	1.9	4.1	5.4	6	5.8
deepmip-eocene-p1-PI	new jersey margin	39.7	-74.9	modern	280	13.7	pr	Precipitation	mm/day	3.6	2.5	4.9	3.7	3.7	4.1	3	3.6	3.7	3.9	3.7	3.6	3.8	4.5	3.9	2.9	2.9	3.3	3.7
deepmip-eocene-p1-x1	new jersey margin	38.3	-56.3	early eocene	280	17.6	pr	Precipitation	mm/day	4.6	3.3	5.8	5.4	4.6	4.5	4.2	5.5	5.2	4.9	4.7	4.3	4.1	4.6	4.8	3.7	3.8	5	5.4
deepmip-eocene-p1-x2	new jersey margin	37.6	-54.4	early eocene	560	21.4	pr	Precipitation	mm/day	5.2	3.3	7	6.5	4.8	4.6	5	6.4	6.1	5.6	4.8	4	4.3	4.7	4.8	3.7	4.6	6.6	6.8
deepmip-eocene-p1-x3	new jersey margin	38.3	-56.3	early eocene	840	25	pr	Precipitation	mm/day	5.3	3.7	6.9	5.9	4.9	5.3	5.1	5.9	5.2	5.1	4.8	4.7	5	5.5	5.4	4.4	4.8	6.1	6.4
deepmip-eocene-p1-x4	new jersey margin	37.2	-53.1	early eocene	1120	26.2	pr	Precipitation	mm/day	4.9	2.8	7.1	5.8	4	4.8	5.1	5.7	4.8	4.4	3.9	3.6	4.1	4.9	5.2	4.1	4.7	6.5	6.8
deepmip_sens_6xCO2	new jersey margin	38.3	-56.3	early eocene	1680	27.8	pr	Precipitation	mm/day	5.7	3.7	7.6	6.9	5.1	5.3	5.4	6.9	6.3	5.5	5	4.7	5.1	5.4	5.4	4.8	5	6.5	7.5
deepmip-eocene-p1-x9	new jersey margin	38.3	-56.3	early eocene	2520	35.5	pr	Precipitation	mm/day	6.4	4.6	8.1	7.3	5.4	5.5	7.2	7	7	6.2	5.5	4.6	5.5	5.4	5.7	6.1	7.4	8.1	7.9
deepmip-eocene-p1-PI	high arctic	87.9	136.2	modern	280	13.7	pr	Precipitation	mm/day	0.5	0.3	1	0.3	0.3	0.8	0.6	0.3	0.3	0.3	0.3	0.4	0.7	0.9	1	0.8	0.6	0.4	0.3
deepmip-eocene-p1-x1	high arctic	82.9	29.5	early eocene	280	17.6	pr	Precipitation	mm/day	0.7	0.4	1.2	0.4	0.5	1	0.9	0.4	0.4	0.4	0.5	0.6	0.8	1	1.2	1.1	0.9	0.6	0.4
deepmip-eocene-p1-x2	high arctic	81.7	28.9	early eocene	560	21.4	pr	Precipitation	mm/day	1.1	0.7	1.8	0.8	0.8	1.2	1.5	0.8	0.8	0.8	0.8	0.9	0.9	1.2	1.7	1.7	1.5	1.2	1
deepmip-eocene-p1-x3	high arctic	82.9	29.5	early eocene	840	25	pr	Precipitation	mm/day	1.4	0.8	2.1	1.3	1	1.4	1.9	1.3	1.2	1	1	1	1	1.3	1.9	2.1	1.9	1.6	1.4
deepmip-eocene-p1-x4	high arctic	80.9	28.4	early eocene	1120	26.2	pr	Precipitation	mm/day	1.6	0.9	2.3	1.5	1.2	1.5	2	1.5	1.5	1.4	1.2	1	1	1.4	2.1	2.3	2.1	1.8	1.5
deepmip_sens_6xCO2	high arctic	82.9	29.5	early eocene	1680	27.8	pr	Precipitation	mm/day	1.7	0.8	2.6	1.8	1.3	1.4	2.3	1.7	1.6	1.5	1.4	1.1	0.9	1.2	2	2.5	2.3	2	1.8
deepmip-eocene-p1-x9	high arctic	82.9	29.5	early eocene	2520	35.5	pr	Precipitation	mm/day	2.9	1	4.1	3.6	2.5	1.7	3.8	3.6	3.5	3.3	2.5	1.6	1	1.5	2.7	3.8	4.1	3.6	3.6
deepmip-eocene-p1-PI	tasman sea	-43.6	149.6	modern	280	13.7	pr	Precipitation	mm/day	2.7	2	3.5	2.2	2.6	3.4	2.7	2.2	2.2	2.3	2.6	3	3.4	3.4	3.4	3.1	2.6	2.3	2.2
deepmip-eocene-p1-x1	tasman sea	-64	158.6	early eocene	280	17.6	pr	Precipitation	mm/day	1.6	1.1	2.1	1.4	1.9	1.7	1.4	1.3	1.8	2	1.9	1.8	1.8	1.6	1.6	1.5	1.4	1.4	1.2
deepmip-eocene-p1-x2	tasman sea	-62.9	160.7	early eocene	560	21.4	pr	Precipitation	mm/day	1.9	1.1	2.4	1.5	2.3	2	1.6	1.4	2.1	2.3	2.4	2.3	2.1	2.1	1.9	1.7	1.7	1.5	1.2
deepmip-eocene-p1-x3	tasman sea	-64	158.6	early eocene	840	25	pr	Precipitation	mm/day	2.4	1.4	3.3	1.9	3	2.6	2.1	1.6	2.5	3.1	3.1	2.8	2.7	2.6	2.5	2.4	2.2	1.8	1.4
deepmip-eocene-p1-x4	tasman sea	-62.1	162	early eocene	1120	26.2	pr	Precipitation	mm/day	2.5	1.3	3.4	1.8	3.2	2.8	2.2	1.6	2.4	3.3	3.3	3.1	2.9	2.9	2.7	2.6	2.4	1.8	1.3
deepmip_sens_6xCO2	tasman sea	-64	158.6	early eocene	1680	27.8	pr	Precipitation	mm/day	2.7	1.4	3.5	2	3.3	3.1	2.3	1.7	2.8	3.4	3.4	3.2	3.1	3.2	3	2.8	2.3	1.8	1.5
deepmip-eocene-p1-x9	tasman sea	-64	158.6	early eocene	2520	35.5	pr	Precipitation	mm/day	3.4	1.7	4.5	3.1	4.2	3.4	2.9	2.9	4.5	4.3	4.2	4	3.5	3.5	3.3	3.6	3.1	2.1	1.7

## Sheet: Sheet 9
Sheet 9	HadCM3L-derived estimates of plant and soil OC stocks under different CO2 scenarios (Source data: fig.4)
Time interval	CO2	PgC	Cpool
pre-PETM	560	1092.1	Soil
PETM	1120	954.337	Soil
Modern	280	867.641	Soil
pre-PETM	560	1126.65	Vegetation
PETM	1120	1418.56	Vegetation
Modern	280	488.942	Vegetation
pre-PETM	560	2218.75	Total
PETM	1120	2372.9	Total
Modern	280	1356.58	Total

## Sheet: Sheet 10
Sheet 10	Total organic carbon burial flux (in MtC/yr-1) in marine sedmietns during the PETM assuming 270kyr duration
Total (PgC)	MtC per PgC	Total (MtC)	Duration (years)	Rate (MtC yr⁻¹)	Reference
10 839	1 000	10 839 000	270 000	40.1	https://agupubs.onlinelibrary.wiley.com/action/downloadSupplement?doi=10.1029%2F2021PA004232&file=2021PA004232-sup-0006-Table+SI-S05.pdf
23 077	1 000	23 077 000	270 000	85.5	https://agupubs.onlinelibrary.wiley.com/action/downloadSupplement?doi=10.1029%2F2021PA004232&file=2021PA004232-sup-0006-Table+SI-S05.pdf
